# Supplementary material for: SO2-resistant NOx reduction over Cu-SAPO-34 catalysts via creating sulfur-phobic Cu sites
Source: Royal Society of Chemistry journal article supplement (doi:10.1039/d2cy02151j), 2023-01-01
Supplement: d2cy02151j1.pdf [file d2cy02151j1.pdf]

## *Electronic Supplementary Information*

### **SO<sub>2</sub>-resistant NO<sub>x</sub> reduction over Cu-SAPO-34 catalysts via creating sulfur-phobic Cu sites**

Jiebing He<sup>†</sup>, Jiang Deng<sup>†</sup>, Jin Zhang, Lupeng Han, Yongjie Shen, Xin Chen, Xiaonan Hu, Junan Wang<sup>\*</sup>, Dongsong Zhang<sup>\*</sup>

State Key Laboratory of Advanced Special Steel, Institute of Materials, School of Materials Science and Engineering, International Joint Laboratory of Catalytic Chemistry, College of Sciences, Shanghai University, Shanghai 200444, China.

<sup>†</sup>These authors contributed equally to this paper.

<sup>\*</sup>To whom correspondence should be addressed:

E-mail: dszhang@shu.edu.cn (DS Zhang); jawang@shu.edu.cn (JA Wang).

## CONTENTS

|                                                                                                                                                                                                                                                                                                                                                                                                                                                                                 |    |
|---------------------------------------------------------------------------------------------------------------------------------------------------------------------------------------------------------------------------------------------------------------------------------------------------------------------------------------------------------------------------------------------------------------------------------------------------------------------------------|----|
| Catalysts preparation.....                                                                                                                                                                                                                                                                                                                                                                                                                                                      | 6  |
| Catalysts characterization .....                                                                                                                                                                                                                                                                                                                                                                                                                                                | 7  |
| <i>In situ</i> DRIFTS experiments .....                                                                                                                                                                                                                                                                                                                                                                                                                                         | 8  |
| <i>In situ</i> Raman experiments.....                                                                                                                                                                                                                                                                                                                                                                                                                                           | 10 |
| In-situ UV-vis experiments.....                                                                                                                                                                                                                                                                                                                                                                                                                                                 | 11 |
| DFT Calculations .....                                                                                                                                                                                                                                                                                                                                                                                                                                                          | 12 |
| Catalytic activity measurements .....                                                                                                                                                                                                                                                                                                                                                                                                                                           | 13 |
| Figure S1. The contents of $Z_2Cu$ and $ZCuOH$ sites in the Cu-SAPO-34 catalyst via ammonia titration method. B stands for Bronsted acid sites and L stands for Lewis acid sites. ....                                                                                                                                                                                                                                                                                          | 14 |
| Figure S2. The contents of $Z_2Cu$ and $ZCuOH$ sites in the Cu-SAPO-34-A catalyst via ammonia titration method. B represents Bronsted acid sites and L represents Lewis acid sites. ....                                                                                                                                                                                                                                                                                        | 15 |
| Figure S3. $H_2$ -TPR profiles of Cu-SAPO-34- $A_2$ and Cu-SAPO-34- $A_3$ catalysts.....                                                                                                                                                                                                                                                                                                                                                                                        | 16 |
| Figure S4. (a) Plots of NO conversion versus temperature for Cu-SAPO-34- $A_2$ , Cu-SAPO-34- $A_3$ , Cu-SAPO-34- $A_2$ -S and Cu-SAPO-34- $A_3$ -S catalysts, and (b) the NO conversion of Cu-SAPO-34- $A_2$ , Cu-SAPO-34- $A_3$ , Cu-SAPO-34- $A_2$ -S and Cu-SAPO-34- $A_3$ -S catalysts at different temperature. Reaction conditions: 500 ppm of NO, 500 ppm of $NH_3$ , 5 vol % $O_2$ , 2.5 vol % $H_2O$ , $N_2$ as the balance gas, and GHSV of $100\ 000\ h^{-1}$ . .... | 18 |
| Figure S5. Plots of $N_2$ selectivity versus temperature for Cu-SAPO-34, Cu-SAPO-34-A, Cu-SAPO-34-S and Cu-SAPO-34-A-S catalysts. Reaction conditions: 500 ppm of NO, 500 ppm of $NH_3$ , 5 vol % $O_2$ , 2.5 vol % $H_2O$ , $N_2$ as the balance gas, and GHSV of $100\ 000\ h^{-1}$ .....                                                                                                                                                                                     | 19 |
| Figure S6. Plots of $N_2$ selectivity versus temperature for Cu-SAPO-34- $A_2$ , Cu-SAPO-34- $A_3$ , Cu-SAPO-34- $A_2$ -S and Cu-SAPO-34- $A_3$ -S catalysts. Reaction conditions: 500 ppm of NO, 500 ppm of $NH_3$ , 5 vol % $O_2$ , 2.5 vol % $H_2O$ , $N_2$ as the balance gas, and GHSV of $100\ 000\ h^{-1}$ . ....                                                                                                                                                        | 20 |
| Figure S7. Arrhenius plots for SCR performance over the Cu-SAPO-34 and Cu-SAPO-34-A catalysts. Reaction conditions: 500 ppm of NO, 500 ppm of $NH_3$ , 5 vol% $O_2$ , $N_2$ as the balance gas, and GHSV of $400\ 000\ h^{-1}$ .....                                                                                                                                                                                                                                            | 21 |
| Figure S8. The most stable configuration of $NH_3$ on $ZCuOH$ and $Z_2Cu$ sites. ....                                                                                                                                                                                                                                                                                                                                                                                           | 22 |
| Figure S9. The most stable configuration of NO on $ZCuOH$ and $Z_2Cu$ sites.....                                                                                                                                                                                                                                                                                                                                                                                                | 23 |
| Figure S10. XRD patterns of Cu-SAPO-34, Cu-SAPO-34-S, Cu-SAPO-34-A and Cu-SAPO-34-A-S catalysts.....                                                                                                                                                                                                                                                                                                                                                                            | 24 |
| Figure S11. (a) SEM image of the Cu-SAPO-34-A catalyst (inset image represented the line scanning results of Cu, Al and O elements) and EDX mapping of the (b) Cu, (c) Al and (d) O elements over the Cu-SAPO-34-A catalyst. ....                                                                                                                                                                                                                                               | 25 |

|                                                                                                                                                                                                                                                                                                                                         |    |
|-----------------------------------------------------------------------------------------------------------------------------------------------------------------------------------------------------------------------------------------------------------------------------------------------------------------------------------------|----|
| Figure S12. (a) SEM image of the Cu-SAPO-34 catalyst (inset image represented the line scanning results of Cu, Al and O elements) and EDX mapping of the (b) Cu, (c) Al and (d) O elements over the Cu-SAPO-34 catalyst.....                                                                                                            | 26 |
| Figure S13. (a) SEM image of the Cu-SAPO-34-A-S catalyst (inset image represented the line scanning results of Cu, Al, O and S elements) and EDX mapping of the (b) Cu, (c) Al, (d) O and (e) S elements over the Cu-SAPO-34-A-S catalyst.....                                                                                          | 27 |
| Figure S14. (a) SEM image of the Cu-SAPO-34-S catalyst (inset image represented the line scanning results of Cu, Al, O and S elements) and EDX mapping of the (b) Cu, (c) Al, (d) O and (e) S elements over the Cu-SAPO-34-S catalyst.....                                                                                              | 28 |
| Figure S15. TG plots of Cu-SAPO-34-A (a) and Cu-SAPO-34 (b) catalysts poisoned in SO <sub>2</sub> +H <sub>2</sub> O+O <sub>2</sub> feed; TG plots of Cu-SAPO-34-A (c) and Cu-SAPO-34 (d) catalysts poisoned in SO <sub>2</sub> +NH <sub>3</sub> +H <sub>2</sub> O+O <sub>2</sub> feed.....                                              | 29 |
| Figure S16. <i>In situ</i> DRIFTs of NH <sub>3</sub> desorption over Cu-SAPO-34-A catalyst as a function of temperature. ....                                                                                                                                                                                                           | 31 |
| Figure S17. <i>In situ</i> DRIFTs of NH <sub>3</sub> desorption over Cu-SAPO-34 catalyst as a function of temperature. ....                                                                                                                                                                                                             | 33 |
| Figure S18. <i>In situ</i> DRIFTs of NH <sub>3</sub> desorption over Cu-SAPO-34-A <sub>2</sub> catalyst as a function of temperature. ....                                                                                                                                                                                              | 34 |
| Figure S19. <i>In situ</i> DRIFTs of NH <sub>3</sub> desorption over Cu-SAPO-34-A <sub>3</sub> catalyst as a function of temperature. ....                                                                                                                                                                                              | 35 |
| Figure S20. <i>In situ</i> DRIFTs of the transient reactions at 250 °C over Cu-SAPO-34-A catalyst between NO+O <sub>2</sub> (a) and preadsorbed NH <sub>3</sub> as a function of time. (b) Consumption of the bands at 1324 cm <sup>-1</sup> and 1460 cm <sup>-1</sup> over Cu-SAPO-34-A catalyst in Figure (a). ....                   | 36 |
| Figure S21. <i>In situ</i> DRIFTs of the transient reactions at 250 °C over Cu-SAPO-34-A catalyst between NO+SO <sub>2</sub> +O <sub>2</sub> (a) and preadsorbed NH <sub>3</sub> as a function of time. (b) Consumption of the bands at 1328 cm <sup>-1</sup> and 1456 cm <sup>-1</sup> over Cu-SAPO-34-A catalysts in Figure (a). .... | 37 |
| Figure S22. <i>In situ</i> DRIFTs of the transient reactions at 250 °C over Cu-SAPO-34 catalyst between NO+O <sub>2</sub> (a) and preadsorbed NH <sub>3</sub> as a function of time. (b) Consumption of the bands at 1330 cm <sup>-1</sup> and 1456 cm <sup>-1</sup> over Cu-SAPO-34 catalyst in Figure (a). ....                       | 38 |
| Figure S23. <i>In situ</i> DRIFTs of the transient reactions at 250 °C over Cu-SAPO-34 catalyst between NO+SO <sub>2</sub> +O <sub>2</sub> (a) and preadsorbed NH <sub>3</sub> as a function of time. (b) Consumption of the bands at 1325 cm <sup>-1</sup> and 1455 cm <sup>-1</sup> over Cu-SAPO-34 catalyst in Figure (a). ....      | 39 |

|                                                                                                                                                                                                                                                                                                                                                            |    |
|------------------------------------------------------------------------------------------------------------------------------------------------------------------------------------------------------------------------------------------------------------------------------------------------------------------------------------------------------------|----|
| Figure S24. In situ DRIFTs of the transient reactions at 250 °C over Cu-SAPO-34-A <sub>2</sub> catalyst between NO+O <sub>2</sub> (a) and preadsorbed NH <sub>3</sub> as a function of time. (b) Consumption of the bands at 1326 cm <sup>-1</sup> and 1482 cm <sup>-1</sup> over Cu-SAPO-34-A <sub>2</sub> catalyst in Figure (a). .....                  | 40 |
| Figure S25. In situ DRIFTs of the transient reactions at 250 °C over Cu-SAPO-34-A <sub>2</sub> catalyst between NO+SO <sub>2</sub> +O <sub>2</sub> (a) and preadsorbed NH <sub>3</sub> as a function of time. (b) Consumption of the bands at 1326 cm <sup>-1</sup> and 1472 cm <sup>-1</sup> over Cu-SAPO-34-A <sub>2</sub> catalyst in Figure (a). ..... | 41 |
| Figure S26. In situ DRIFTs of the transient reactions at 250 °C over Cu-SAPO-34-A <sub>3</sub> catalyst between NO+O <sub>2</sub> (a) and preadsorbed NH <sub>3</sub> as a function of time. (b) Consumption of the bands at 1324 cm <sup>-1</sup> and 1480 cm <sup>-1</sup> over Cu-SAPO-34-A <sub>3</sub> catalyst in Figure (a). .....                  | 42 |
| Figure S27. In situ DRIFTs of the transient reactions at 250 °C over Cu-SAPO-34-A <sub>3</sub> catalyst between NO+SO <sub>2</sub> +O <sub>2</sub> (a) and preadsorbed NH <sub>3</sub> as a function of time. (b) Consumption of the bands at 1329 cm <sup>-1</sup> and 1480 cm <sup>-1</sup> over Cu-SAPO-34-A <sub>3</sub> catalyst in Figure (a). ..... | 43 |
| Figure S28. Schematic illustration of gases alternation for NH <sub>3</sub> /NO in the pulsed DRIFTs experiments. ....                                                                                                                                                                                                                                     | 44 |
| Figure S29. Mapping picture of pulse DRIFTs spectra of SO <sub>2</sub> -poisoned Cu-SAPO-34-A-S catalysts obtained at 250 °C before the pretreated at 300 °C. ....                                                                                                                                                                                         | 45 |
| Figure S30. Mapping picture of pulse DRIFTs spectra of SO <sub>2</sub> -poisoned Cu-SAPO-34-S catalysts obtained at 250 °C before the pretreated at 300 °C. ....                                                                                                                                                                                           | 46 |
| Figure S31. Mapping picture of pulse DRIFTs spectra of SO <sub>2</sub> -poisoned Cu-SAPO-34-A-S catalysts obtained at 250 °C before the pretreated at 350 °C. ....                                                                                                                                                                                         | 47 |
| Figure S32. Mapping picture of pulse DRIFTs spectra of SO <sub>2</sub> -poisoned Cu-SAPO-34-S catalysts obtained at 250 °C before the pretreated at 350 °C. ....                                                                                                                                                                                           | 48 |
| Figure S33. Mass spectrometry plots on NH <sub>3</sub> , NO and H <sub>2</sub> O versus time in the exhaust gas of pulse DRIFTs spectra of Cu-SAPO-34-A-S catalysts which were obtained at 250 °C before the pretreatment at 300 °C. ....                                                                                                                  | 49 |
| Figure S34. Mass spectrometry plots on NH <sub>3</sub> , NO and H <sub>2</sub> O versus time in the exhaust gas of pulse DRIFTs spectra of Cu-SAPO-34-S catalysts which were obtained at 250 °C before the pretreatment at 300 °C. ....                                                                                                                    | 50 |
| Figure S35. Mass spectrometry plots on NH <sub>3</sub> , NO and H <sub>2</sub> O versus time in the exhaust gas of pulse DRIFTs spectra of Cu-SAPO-34-A-S catalysts which were obtained at 250 °C before the pretreatment at 350 °C. ....                                                                                                                  | 51 |
| Figure S36. Mass spectrometry plots on NH <sub>3</sub> , NO and H <sub>2</sub> O versus time in the exhaust gas of pulse DRIFTs spectra of Cu-SAPO-34-S catalysts which were obtained at 250 °C before the pretreatment at 350 °C. ....                                                                                                                    | 52 |

|                                                                                                                                                                                                                                                                       |    |
|-----------------------------------------------------------------------------------------------------------------------------------------------------------------------------------------------------------------------------------------------------------------------|----|
| Figure S37. <i>In situ</i> UV-vis spectra of oxidation and reduction half-reaction of the Cu-SAPO-34-A catalyst at 250 °C. The oxidizing feed is 1000 ppm NO+O <sub>2</sub> , the reduction feed is 1000 ppm NH <sub>3</sub> .<br>.....                               | 53 |
| Figure S38. <i>In situ</i> UV-vis spectra of oxidation and reduction half-reaction of the Cu-SAPO-34-A catalyst at 250 °C. The oxidizing feed is 1000 ppm NO+1000 ppm SO <sub>2</sub> +O <sub>2</sub> , and the reduction feed is 1000 ppm NH <sub>3</sub> .<br>..... | 54 |
| Figure S39. <i>In situ</i> UV-vis spectra of oxidation and reduction half-reaction of the Cu-SAPO-34 catalyst at 250 °C. The oxidizing feed is 1000 ppm NO+O <sub>2</sub> , the reduction feed is 1000 ppm NH <sub>3</sub> .<br>.....                                 | 55 |
| Figure S40. <i>In situ</i> UV-vis spectra of oxidation and reduction half-reaction of the Cu-SAPO-34 catalyst at 250 °C. The oxidizing feed is 1000 ppm NO+1000 ppm SO <sub>2</sub> +O <sub>2</sub> , the reduction feed is 1000 ppm NH <sub>3</sub> .<br>.....       | 56 |
| Table S1. The content of Z <sub>2</sub> Cu and ZCuOH sites in Cu-SAPO-34 and Cu-SAPO-34-A catalysts calibrated by H <sub>2</sub> -TPR and ammonia titration.<br>.....                                                                                                 | 57 |
| Table S2. O, Al, Cu and S elements content in Cu-SAPO-34, Cu-SAPO-34-A, Cu-SAPO-34-S and Cu-SAPO-34-A-S catalysts. ....                                                                                                                                               | 58 |
| Table S3. The specific breakthrough time and SO <sub>2</sub> adsorption capacity of various catalysts. ....                                                                                                                                                           | 59 |
| Table S4. Adsorption energy and adsorption distance of NH <sub>3</sub> , NO, SO <sub>2</sub> and competitive adsorption of NO with SO <sub>2</sub> .<br>.....                                                                                                         | 60 |
| Table S5. The deposition quality of sulfate species on Cu-SAPO-34-A and Cu-SAPO-34 catalysts.<br>.....                                                                                                                                                                | 61 |
| References.....                                                                                                                                                                                                                                                       | 62 |

## Catalysts preparation

The conditions for HA of Cu-SAPO-34 catalyst at 700 and 900 °C are as follows: 2 g of Cu-SAPO-34 were placed into the muffle furnace. The target temperature was set at 700/900 °C for 1 h, and 10% water vapor was introduced when the temperature was raised to 700/900 °C, which was kept for 16 h. Then, the muffle furnace was naturally cooled down in the absence of water vapor. The samples were finally named as Cu-SAPO-34-A<sub>2</sub> and Cu-SAPO-34-A<sub>3</sub>.

The sulfation treatment of the catalyst is as follows. The Cu-SAPO-34, Cu-SAPO-34-A<sub>2</sub>, Cu-SAPO-34-A<sub>3</sub> and Cu-SAPO-34-A are pelletized through 40-60 mesh, then, 0.21 g of catalysts was placed in a quartz reaction tube. The temperature is raised to 300 °C for 20 min N<sub>2</sub> feed, and then 5 vol% O<sub>2</sub>, 5 vol% H<sub>2</sub>O, 40 ppm SO<sub>2</sub> and 50 ppm NH<sub>3</sub> are introduced when the temperature rises to 300 °C and the temperature is kept for 3h. The catalysts are finally labeled as Cu-SAPO-34-S, Cu-SAPO-34-A<sub>2</sub>-S, Cu-SAPO-34-A<sub>3</sub>-S and Cu-SAPO-34-A-S catalysts.

The sulfation treatment of the catalysts without NH<sub>3</sub> is similar to the above sulfation treatment, except that the sulfation treatment process only contains 5 vol% O<sub>2</sub>, 5 vol% H<sub>2</sub>O, and 40 ppm SO<sub>2</sub>.

## Catalysts characterization

The structure of catalysts was measured on an X-ray diffractometer (Rigaku D/MAS-RB) with Cu-K $\alpha$  (40 kV, 40 mA) radiation, and the  $2\theta$  angles were recorded in the range of  $5^\circ$  to  $80^\circ$  with the scan speed of  $8^\circ/\text{min}$ . UV-vis spectra were conducted on the Cary Series UV-Vis-NIR Spectrophotometer (Agilent Cary 5000). Thermogravimetric analysis used a Thermo scientific (TRACE 1300) model thermogravimetric analyzer. Hydrogen temperature-programmed reduction ( $\text{H}_2$ -TPR) was tested on a Micromeritics AutoChem 2920 II auto-adsorption apparatus with a thermal conductivity detector (TCD). Before the reduction process, 100 mg catalysts were pretreated under Ar atmosphere with a flow rate of 30 mL/min at  $300^\circ\text{C}$  for 30 min, and then cooled to room temperature under Ar atmosphere. In  $\text{H}_2$ -TPR runs, the sample was exposed to 10%  $\text{H}_2/\text{Ar}$  and then the reactor temperature was raised from room temperature to  $900^\circ\text{C}$  with a rate of  $10^\circ\text{C}/\text{min}$ . The  $\text{SO}_2$  breakthrough analysis of gas was carried out on a breakthrough analyzer (3P instrument mixSorb SHP). Before breakthrough analysis, 100 mg catalysts were pretreated under  $\text{N}_2$  atmosphere with a flow rate of 30 mL/min for 30 min at  $300^\circ\text{C}$ . When the temperature was fixed at  $200/300^\circ\text{C}$  under nitrogen atmosphere, 0.4%  $\text{SO}_2/\text{N}_2$  was introduced to the catalyst to proceed with the breakthrough analysis. The X-ray adsorption fine structure (XAFS) spectra (Cu K-edge) of various supported Cu catalysts and references (Cu foil and  $\text{CuO}_2$ ) were collected at B114W1 beamline in Shanghai Synchrotron Radiation Facility (SSRF). The data was carried out in the transmission mode at ambient temperature.

### *In situ* DRIFTS experiments

*In situ* DRIFTS was performed on the Nicolet 6700 spectrometer from Thermo Fisher Scientific of the United States with a mercury-cadmium-telluride (MCT/A) detector cooled by liquid nitrogen. The reaction cell (Harrick Scientific) was fitted with KBr windows and connected to a purging and adsorption gas control system. The powder sample in the reaction cell was treated under N<sub>2</sub> at 300 °C for 0.5 h to remove the surface impurities. Then the reaction cell was cooled to the target temperatures including 300, 250, 200, 150, 100, 50 and 30 °C. Background spectra were recorded at each target temperature. Afterwards, 1000 ppm NH<sub>3</sub>/N<sub>2</sub> was used as the inlet gas for the reaction cell for 0.5 h, followed by purging with N<sub>2</sub> for another 10 min. The spectra were recorded by accumulating 64 scans with a resolution of 4 cm<sup>-1</sup>. Nicolet 6700 spectrometer with reaction cell was also used to collect *in situ* DRIFTS spectra of NO+O<sub>2</sub>+(SO<sub>2</sub>) on catalyst sample pretreated with NH<sub>3</sub> under 250 °C. The catalyst sample was preheated at 300 °C for 1 h in N<sub>2</sub>, followed by collecting the background spectrum at each target temperature. The powder sample in the cell was firstly exposed to 1000 ppm NO+(1000 ppm SO<sub>2</sub>)+5.0 % O<sub>2</sub>/N<sub>2</sub> for 0.5 h and then used N<sub>2</sub> to purge for another 10 min. After that, the gas flow was switched to 1000 ppm NH<sub>3</sub>/N<sub>2</sub> and the spectra were collected at 0, 5, 10, 15, 20, 25 and 30 min. Other transient reactions of NO+O<sub>2</sub>+(SO<sub>2</sub>) on the catalyst sample pretreated with NH<sub>3</sub> were similar to *in situ* DRIFTS of NH<sub>3</sub> on catalyst sample pretreated with NO+O<sub>2</sub>+(SO<sub>2</sub>).



The *in situ* pulsed infrared experiment is to pretreat the Cu-SAPO-34-S and Cu-SAPO-34-A-S under N<sub>2</sub> atmosphere at 300/350 °C for 30 min, and then lower the temperature to 250 °C for pulse experiment. The spectra were recorded by accumulating 32 scans with a resolution of 4 cm<sup>-1</sup>, so the spectra were collected every 0.5 min. Firstly, pass in 1000 ppm NH<sub>3</sub> for 0~2.5 min, and then pass in 1000 ppm NO+5vol% O<sub>2</sub> at 2.5~5 min. We define 5 min of circulating NH<sub>3</sub>/NO+O<sub>2</sub> as a reaction cycle, and continuous NH<sub>3</sub>/NO+O<sub>2</sub> gas reaction for 10 cycles.

### *In situ* Raman experiments

The Raman spectra were carried out on a LabRAM HR Evolution apparatus. The spectra were acquired in the range of 200~1300  $\text{cm}^{-1}$  using a laser with a wavelength of 325 nm. The spectral resolution employed was 4  $\text{cm}^{-1}$ . The *in situ* Raman test conditions were as follows. A small number of samples were placed in the *in situ* reaction cell, and the test laser was 325 nm ultraviolet light. At first, the spectrum was collected under  $\text{N}_2$  atmosphere, and then slowly heated to 300  $^{\circ}\text{C}$  for pretreatment for 0.5 h. After the pretreatment, the temperature was lowered to 30  $^{\circ}\text{C}$ , 1000 ppm  $\text{SO}_2$ +5 vol%  $\text{O}_2$  was introduced to react for 1 h, and then  $\text{N}_2$  was introduced to purge for 10 min. Subsequently, the spectra at 30, 90, 150, 210, 270, 330  $^{\circ}\text{C}$  were collected during the continuous heating process.

## In-situ UV-vis experiments

The spectrum collection range was 200~800  $\text{cm}^{-1}$ , and the spectrum was collected every 2 min. The *in situ* UV-vis test conditions were as follows. A small number of samples were placed in the *in situ* reaction cell and placed on the *in situ* reaction table, and the temperature was raised to 300 °C for 30 min in a 5 vol%  $\text{O}_2/\text{N}_2$  atmosphere. Then the temperature was lowered to 250 °C for *in situ* UV-vis experiments. Oxidation and reduction experiments was to firstly react for 30 min under 1000 ppm NO (1000 ppm  $\text{SO}_2$ )+5vol%  $\text{O}_2$ atmosphere, then cut off 1000 ppm NO (1000 ppm  $\text{SO}_2$ )+5 vol%  $\text{O}_2$  and purged for 10 min under  $\text{N}_2$  atmosphere, and finally introduced 1000 ppm  $\text{NH}_3$  for reaction.

## DFT Calculations

The calculations were carried out based on density functional theory (DFT) in the generalized gradient approximation (GGA) with the functional of Perdew, Burke and Ernzerh (PBE) <sup>1</sup> as implemented in the Vienna ab initio Simulation Package code (VASP 5.4.1) <sup>2</sup>. The  $3d^{10}4s^1$ ,  $3s^23p^4$ ,  $3s^2p^1$ ,  $2s^22p^2$ ,  $2s^22p^3$ , and  $2s^22p^4$  of Cu, S, Al, Si, N, and O atoms were treated as valence electrons, respectively, and the remaining core electrons were represented by the Troullier-Martins norm conserving pseudopotentials <sup>3</sup>. SAPO-34 was modeled in its rhombohedral unit cell. All Cu-SAPO-34 periodic structures including different copper species ( $ZCuOH$  and  $Z_2Cu$ ) are built in a  $2 \times 2 \times 2$  supercell. The Brillouin zone integration was performed using Monkhorst-Pack scheme with  $1 \times 1 \times 1$  k-points. The force and energy convergences were 0.02 eV/Å and  $10^{-4}$  eV for geometry optimizations, respectively. Taking into change the  $ZCuOH$  into  $Z_2Cu$  by hydrothermal aging method, the Cu-SAPO-34 was modeled with the  $ZCuOH$  configuration, while the Cu-SAPO-34-A was modeled as  $Z_2Cu$ . Periodic boundary conditions were used for all systems. All calculations were spin polarized. The energy cutoff of 400 eV was chosen to guarantee convergence of the total energies and forces. All the calculations were performed at  $\Gamma$  point of the Brillouin zone. The adsorption energy for  $NH_3$ ,  $NO$  and  $SO_2$  molecules on  $Z_2Cu$  and  $ZCuOH$  was defined as  $E_{ads} = E_{mol}@(\text{Z}_2\text{Cu}) - E(\text{Z}_2\text{Cu}) - E(\text{mol})$ , and the adsorption energy for these molecules on  $ZCuOH$  was defined as  $E_{ads} = E_{mol}@(\text{ZCuOH}) - E(\text{ZCuOH}) - E(\text{mol})$ , where mol denotes  $NH_3$ ,  $NO$  and  $SO_2$  molecules.

## Catalytic activity measurements

The evaluations of SCR activity were measured by using 0.21 g catalysts (40–60 mesh) in a fixed-bed reactor. The composition of mixed gas was: 500 ppm NO, 500 ppm NH<sub>3</sub>, 5 vol % O<sub>2</sub> and 2.5 vol% H<sub>2</sub>O in the N<sub>2</sub> balance. The gas concentrations of NO, NO<sub>2</sub>, NH<sub>3</sub>, H<sub>2</sub>O, and N<sub>2</sub>O were simultaneously monitored by an FTIR spectrometer (Thermo Fisher, ANTARIS IGS Analyzer). The total gas flow rate was 510 mL/min, which was corresponding to 100 000 h<sup>-1</sup> gas hourly space velocity (GHSV). The NO conversion percentage was calculated using the formulas (1, 2):

$$\text{NO conversion (\%)} = \frac{[\text{NO}]_{\text{in}} - [\text{NO}]_{\text{out}}}{[\text{NO}]_{\text{in}}} \times 100\% \quad (1)$$

$$\text{N}_2 \text{ selectivity (\%)} = 1 - \frac{2[\text{N}_2\text{O}]_{\text{out}}}{[\text{NO}]_{\text{in}} + [\text{NH}_3]_{\text{in}} - [\text{NO}]_{\text{out}} - [\text{NH}_3]_{\text{out}}} \times 100\% \quad (2)$$

where [NO]<sub>in</sub>, [NH<sub>3</sub>]<sub>in</sub>, [NO]<sub>out</sub>, [NH<sub>3</sub>]<sub>out</sub> and [N<sub>2</sub>O]<sub>out</sub> corresponded to the concentration of NO, NH<sub>3</sub> and N<sub>2</sub>O in the inlet and outlet in a steady-state, respectively.

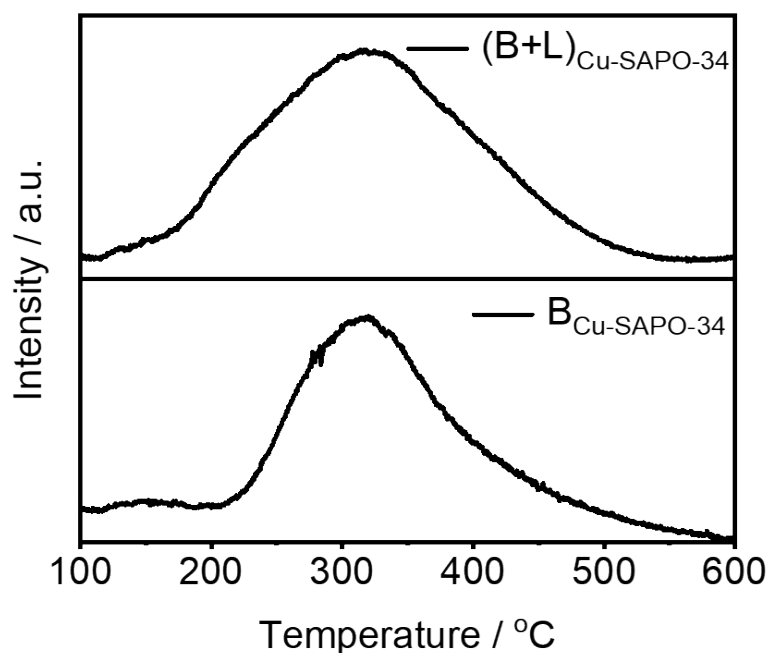

Figure S1. The contents of  $Z_2Cu$  and  $ZCuOH$  sites in the Cu-SAPO-34 catalyst via ammonia titration method. B stands for Bronsted acid sites and L stands for Lewis acid sites.

The results of ammonia titration show that the proportion of  $-NH_2$  species adsorbed on the  $Z_2Cu$  sites for Cu-SAPO-34 is 13%, and the  $NH_4^+$  species adsorbed on the  $ZCuOH$  sites is 87%. Studies have shown that  $Z_2Cu$  sites adsorb 4 molecules of  $NH_3$  to form  $Z_2Cu(NH_3)_4$ , and  $ZCuOH$  sites adsorb 3 molecules of  $NH_3$  to form  $ZCu(NH_3)_3(OH)$ . Therefore, it can be calculated that the contents of  $ZCuOH$  and  $Z_2Cu$  sites in the Cu-SAPO-34 is 90.0% and 10.0%, respectively.

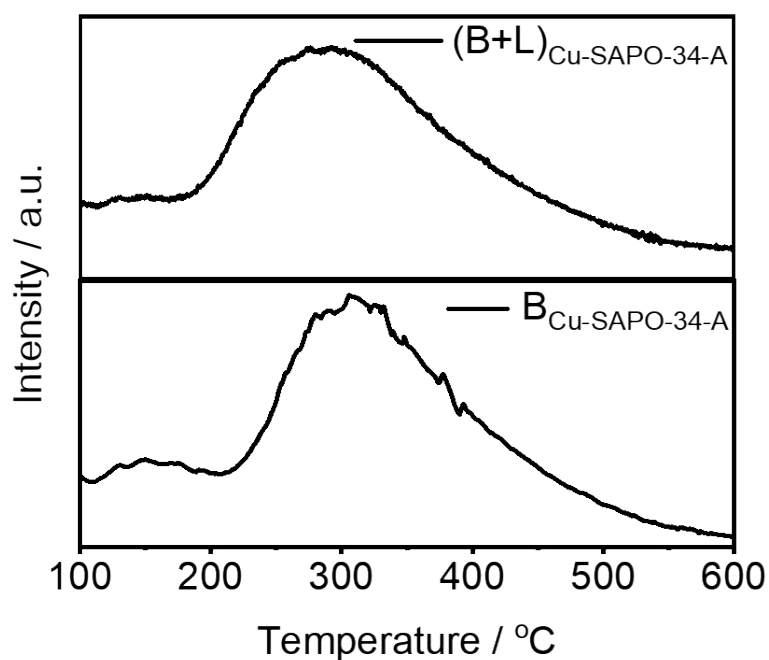

Figure S2. The contents of  $Z_2Cu$  and  $ZCuOH$  sites in the Cu-SAPO-34-A catalyst via ammonia titration method. B represents Bronsted acid sites and L represents Lewis acid sites.

The results of ammonia titration show that the proportion of  $NH_4^+$  and  $-NH_2$  species adsorbed on the  $ZCuOH$  and  $Z_2Cu$  sites for Cu-SAPO-34-A accounted for 71% and 29%, respectively. Studies have shown that  $Z_2Cu$  sites adsorb 4 molecules of  $NH_3$  to form  $Z_2Cu(NH_3)_4$ , and  $ZCuOH$  sites adsorb 3 molecules of  $NH_3$  to form  $ZCu(NH_3)_3(OH)$ . Therefore, the content of  $ZCuOH$  and  $Z_2Cu$  sites in the Cu-SAPO-34-A is 76.5% and 23.5%, respectively.

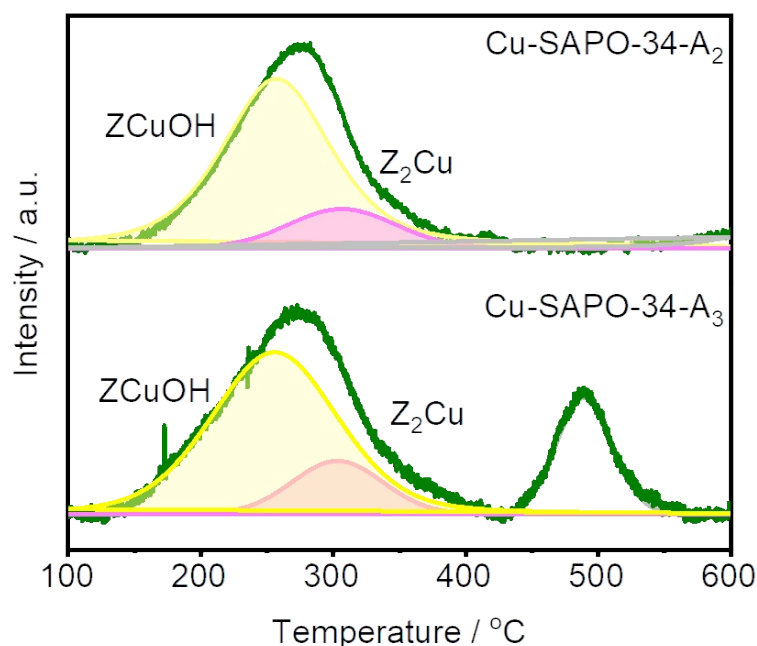

Figure S3. H<sub>2</sub>-TPR profiles of Cu-SAPO-34-A<sub>2</sub> and Cu-SAPO-34-A<sub>3</sub> catalysts.

It can be seen from Figure S3 that both Cu-SAPO-34-A<sub>2</sub> and Cu-SAPO-34-A<sub>3</sub> have two reduction peaks at 200-400 °C. The reduction peak at low temperature is attributed to the reduction at ZCuOH sites, and the reduction at high temperature is attributed to the reduction at Z<sub>2</sub>Cu sites. By integrating the reduction peak area of catalyst Cu-SAPO-34-A<sub>2</sub> and Cu-SAPO-34-A<sub>3</sub>, it can be seen that the content of ZCuOH sites and Z<sub>2</sub>Cu sites in Cu-SAPO-34-A<sub>2</sub> is 84.0% and 16.0% respectively, and the content of ZCuOH sites and Z<sub>2</sub>Cu sites in Cu-SAPO-34-A<sub>3</sub> is 81.8% and 18.2% respectively. Cu-SAPO-34-A<sub>3</sub> has a small reduction peak at 450-550 °C, the attribution of this peak is still controversial in the existing research. Some researchers<sup>4-6</sup> believe that in the reduction of Cu-CHA catalyst, the reduction peak between 350-550 °C is attributed to the reduction of Z<sub>2</sub>Cu site in the six-member ring. Some research<sup>7-11</sup>



concluded that the H<sub>2</sub>-TPR reduction peak of Cu-CHA catalyst near 400-500 °C is the reduction from Cu<sup>+</sup> to Cu<sup>0</sup>. Some researchers<sup>12</sup> also attributed the reduction peak at 400-600 °C to the reduction of Cu<sub>2</sub>Al<sub>2</sub>O<sub>4</sub> species. To sum up, the reduction peak of Cu-CHA catalyst at about 400-500 °C may be attributed to the reduction of Cu species in the six-member ring, the reduction of Cu<sup>+</sup> to Cu<sup>0</sup> and the reduction of Cu<sub>2</sub>Al<sub>2</sub>O<sub>4</sub> species. If a new Cu<sub>2</sub>Al<sub>2</sub>O<sub>4</sub> species reduction peak appears in the Cu-CHA, it indicates that the structure of the catalyst collapses, which shows the decline of NH<sub>3</sub>-SCR activity at high temperature. In this manuscript, Cu-SAPO-34-A, Cu-SAPO-34-A<sub>2</sub>, Cu-SAPO-34-A<sub>3</sub> and Cu-SAPO-34 maintained nearly 100% NO conversion at 270-480 °C. Therefore, the reduction peak here is classified as the further reduction of Cu species in the six-member ring or the reduction of Cu<sup>+</sup> species to Cu<sup>0</sup> species.

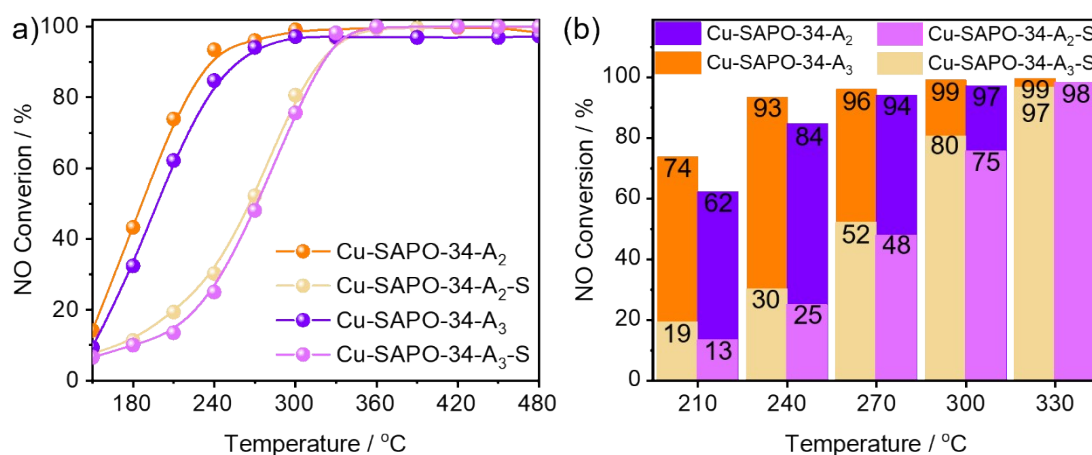

Figure S4. (a) Plots of NO conversion versus temperature for Cu-SAPO-34-A<sub>2</sub>, Cu-SAPO-34-A<sub>3</sub>, Cu-SAPO-34-A<sub>2</sub>-S and Cu-SAPO-34-A<sub>3</sub>-S catalysts, and (b) the NO conversion of Cu-SAPO-34-A<sub>2</sub>, Cu-SAPO-34-A<sub>3</sub>, Cu-SAPO-34-A<sub>2</sub>-S and Cu-SAPO-34-A<sub>3</sub>-S catalysts at different temperature. Reaction conditions: 500 ppm of NO, 500 ppm of NH<sub>3</sub>, 5 vol % O<sub>2</sub>, 2.5 vol % H<sub>2</sub>O, N<sub>2</sub> as the balance gas, and GHSV of 100 000 h<sup>-1</sup>.

Figure S4 shows the NH<sub>3</sub>-SCR activity and SO<sub>2</sub>-resistance of Cu-SAPO-34 treated at different hydrothermal aging temperatures. Cu-SAPO-34-A<sub>2</sub> showed more than 90% NO conversion at 240-480 °C, and Cu-SAPO-34-A<sub>3</sub> showed lower NO conversion at 150-480 °C than Cu-SAPO-34-A<sub>2</sub>, and the NO conversion was higher than 90% after reaching 270 °C (Figure S4a). Figure S4b shows the NO conversion of Cu-SAPO-34-A<sub>2</sub>, Cu-SAPO-34-A<sub>3</sub>, Cu-SAPO-34-A<sub>2</sub>-S and Cu-SAPO-34-A<sub>3</sub>-S at 210, 240, 270, 300 and 330 °C. It can be seen that the NO conversion of Cu-SAPO-34-A<sub>2</sub> is higher than that of Cu-SAPO-34-A<sub>3</sub> at each temperature point, and the activity of Cu-SAPO-34-A<sub>2</sub>-S is higher than that of Cu-SAPO-34-A<sub>3</sub>-S.

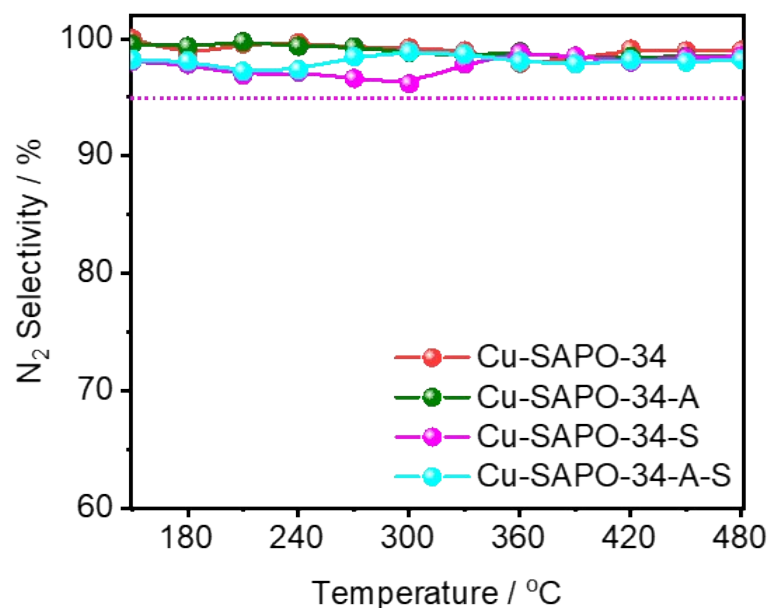

Figure S5. Plots of N<sub>2</sub> selectivity versus temperature for Cu-SAPO-34, Cu-SAPO-34-A, Cu-SAPO-34-S and Cu-SAPO-34-A-S catalysts. Reaction conditions: 500 ppm of NO, 500 ppm of NH<sub>3</sub>, 5 vol % O<sub>2</sub>, 2.5 vol % H<sub>2</sub>O, N<sub>2</sub> as the balance gas, and GHSV of 100 000 h<sup>-1</sup>.

Figure S5 shows the N<sub>2</sub> selectivity of NH<sub>3</sub>-SCR reaction of Cu-SAPO-34, Cu-SAPO-34-A, Cu-SAPO-34-S and Cu-SAPO-34-A-S catalysts in the temperature window of 150-480 °C. Only a small amount of N<sub>2</sub>O is produced in the temperature window of 150-480 °C for Cu-SAPO-34 and Cu-SAPO-34-A catalysts, so their N<sub>2</sub> selectivity is always higher than 98%. The N<sub>2</sub> selectivity of the Cu-SAPO-34-S catalyst in the temperature window of 150-330 and 330-480 °C is not less than 96 and 98%, respectively. The N<sub>2</sub> selectivity of the Cu-SAPO-34-A-S catalyst in the temperature window of 150-270 and 270-480 °C is not less than 96 and 98%, respectively.

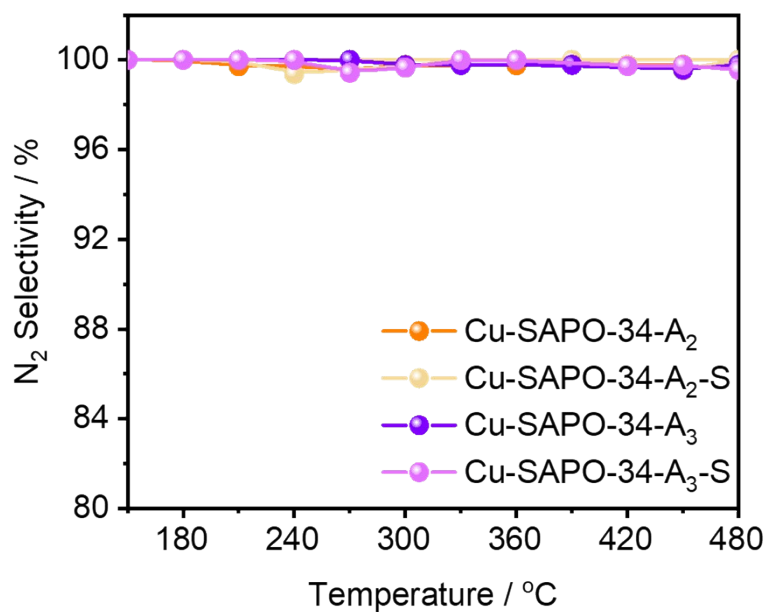

Figure S6. Plots of N<sub>2</sub> selectivity versus temperature for Cu-SAPO-34-A<sub>2</sub>, Cu-SAPO-34-A<sub>3</sub>, Cu-SAPO-34-A<sub>2</sub>-S and Cu-SAPO-34-A<sub>3</sub>-S catalysts. Reaction conditions: 500 ppm of NO, 500 ppm of NH<sub>3</sub>, 5 vol % O<sub>2</sub>, 2.5 vol % H<sub>2</sub>O, N<sub>2</sub> as the balance gas, and GHSV of 100 000 h<sup>-1</sup>.

Figure S6 shows that Cu-SAPO-34-A<sub>2</sub>, Cu-SAPO-34-A<sub>3</sub>, Cu-SAPO-34-A<sub>2</sub>-S and Cu-SAPO-34-A<sub>3</sub>-S have excellent N<sub>2</sub> selectivity in the temperature window of 150-480 °C.

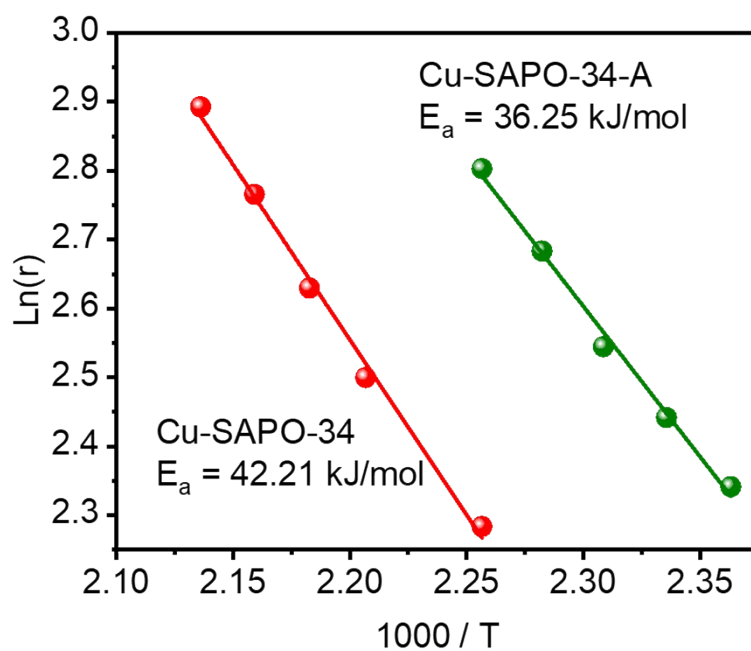

Figure S7. Arrhenius plots for SCR performance over the Cu-SAPO-34 and Cu-SAPO-34-A catalysts. Reaction conditions: 500 ppm of NO, 500 ppm of NH<sub>3</sub>, 5 vol% O<sub>2</sub>, N<sub>2</sub> as the balance gas, and GHSV of 400 000 h<sup>-1</sup>

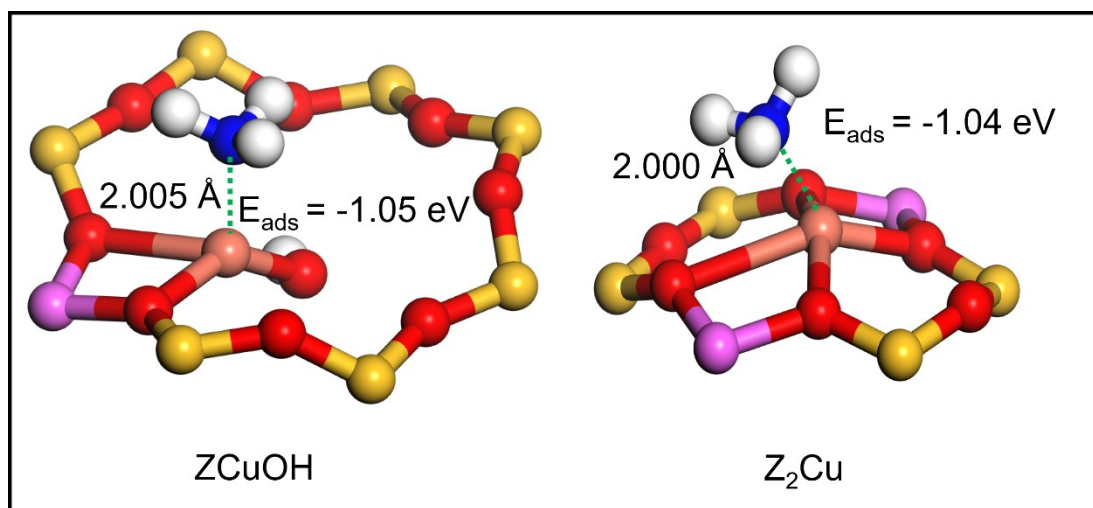

Figure S8. The most stable configuration of NH<sub>3</sub> on ZCuOH and Z<sub>2</sub>Cu sites.

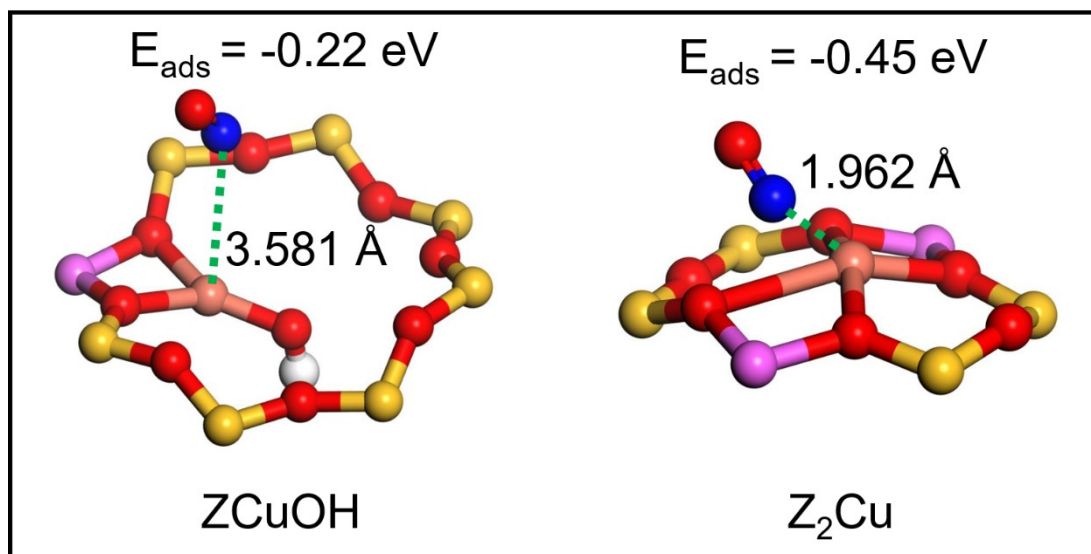

Figure S9. The most stable configuration of NO on ZCuOH and Z<sub>2</sub>Cu sites.

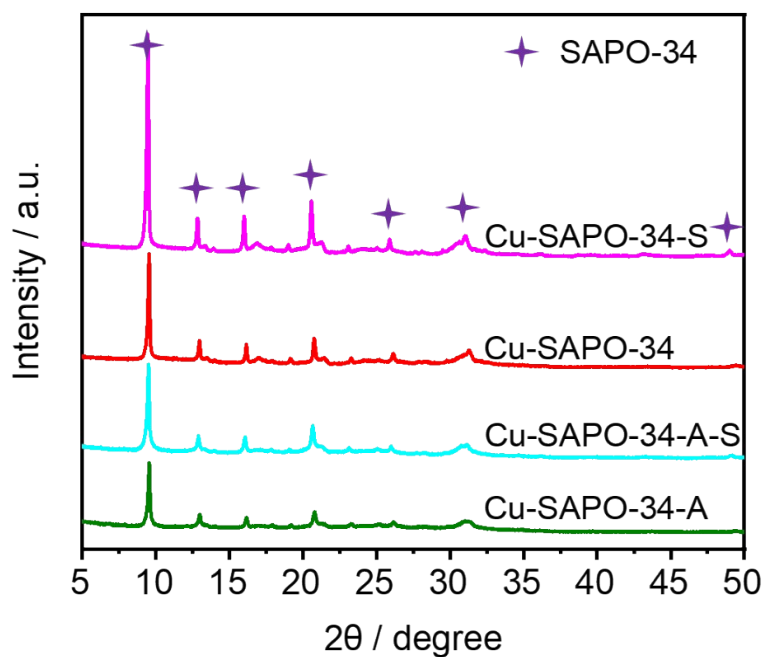

Figure S10. XRD patterns of Cu-SAPO-34, Cu-SAPO-34-S, Cu-SAPO-34-A and Cu-SAPO-34-A-S catalysts.

It can be seen from the XRD patterns that the Cu-SAPO-34, Cu-SAPO-34-S, Cu-SAPO-34-A and Cu-SAPO-34-A-S all maintain the zeolite crystal structure of SAPO-34, indicating that SO<sub>2</sub>-poisoning does not damage the framework structure of the catalyst. At the same time, there is no obvious diffraction peak of sulfate species, indicating that there are no crystalline sulfate species.



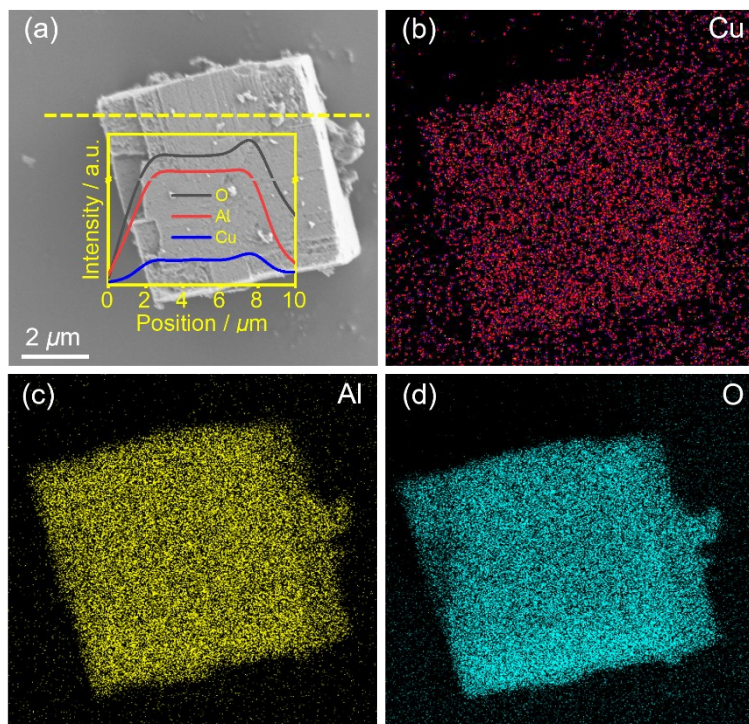

Figure S11. (a) SEM image of the Cu-SAPO-34-A catalyst (inset image represented the line scanning results of Cu, Al and O elements) and EDX mapping of the (b) Cu, (c) Al and (d) O elements over the Cu-SAPO-34-A catalyst.

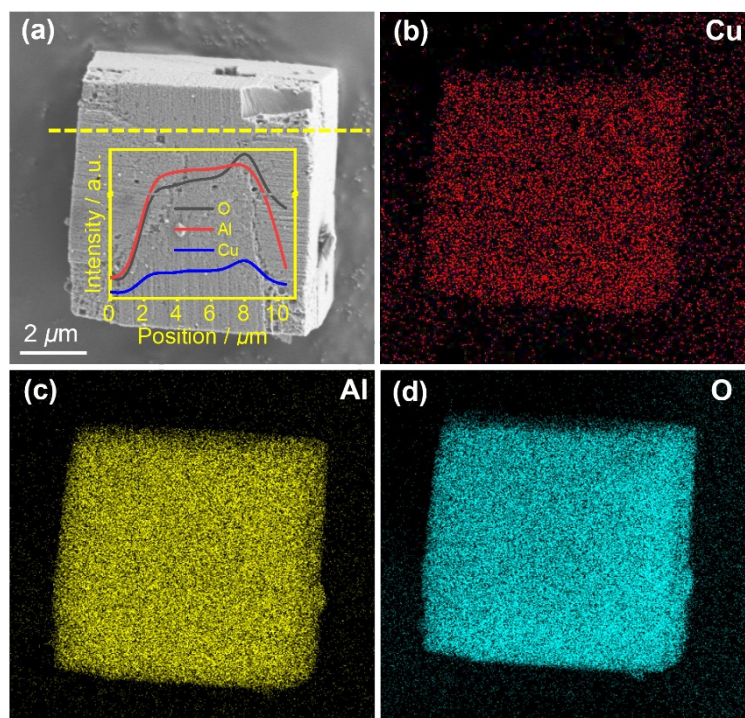

Figure S12. (a) SEM image of the Cu-SAPO-34 catalyst (inset image represented the line scanning results of Cu, Al and O elements) and EDX mapping of the (b) Cu, (c) Al and (d) O elements over the Cu-SAPO-34 catalyst.

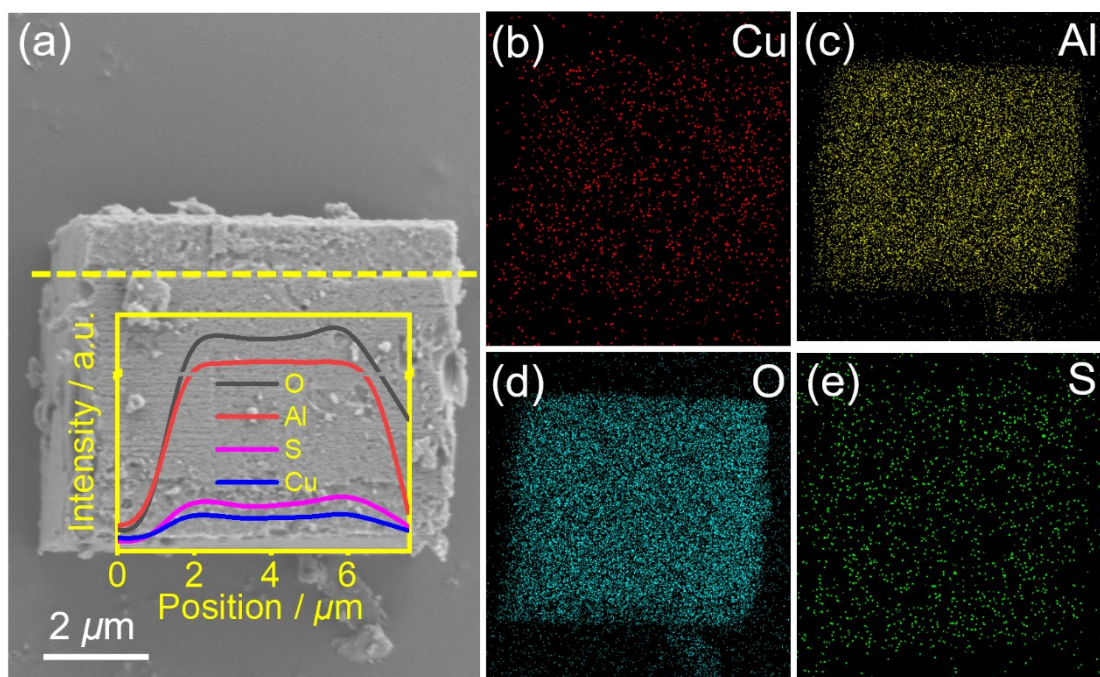

Figure S13. (a) SEM image of the Cu-SAPO-34-A-S catalyst (inset image represented the line scanning results of Cu, Al, O and S elements) and EDX mapping of the (b) Cu, (c) Al, (d) O and (e) S elements over the Cu-SAPO-34-A-S catalyst.

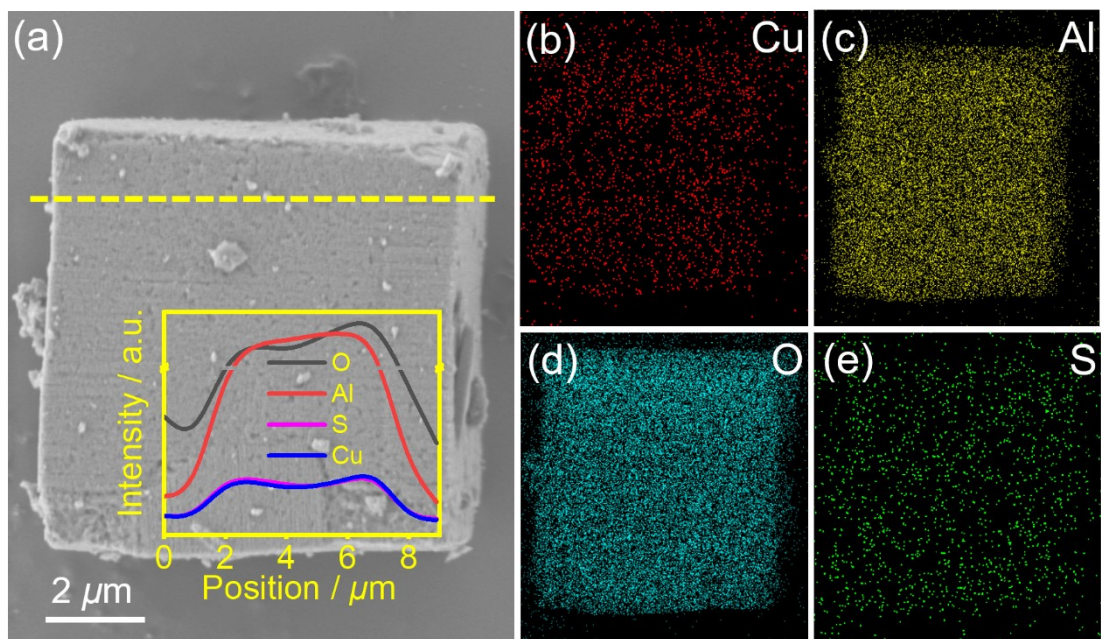

Figure S14. (a) SEM image of the Cu-SAPO-34-S catalyst (inset image represented the line scanning results of Cu, Al, O and S elements) and EDX mapping of the (b) Cu, (c) Al, (d) O and (e) S elements over the Cu-SAPO-34-S catalyst.

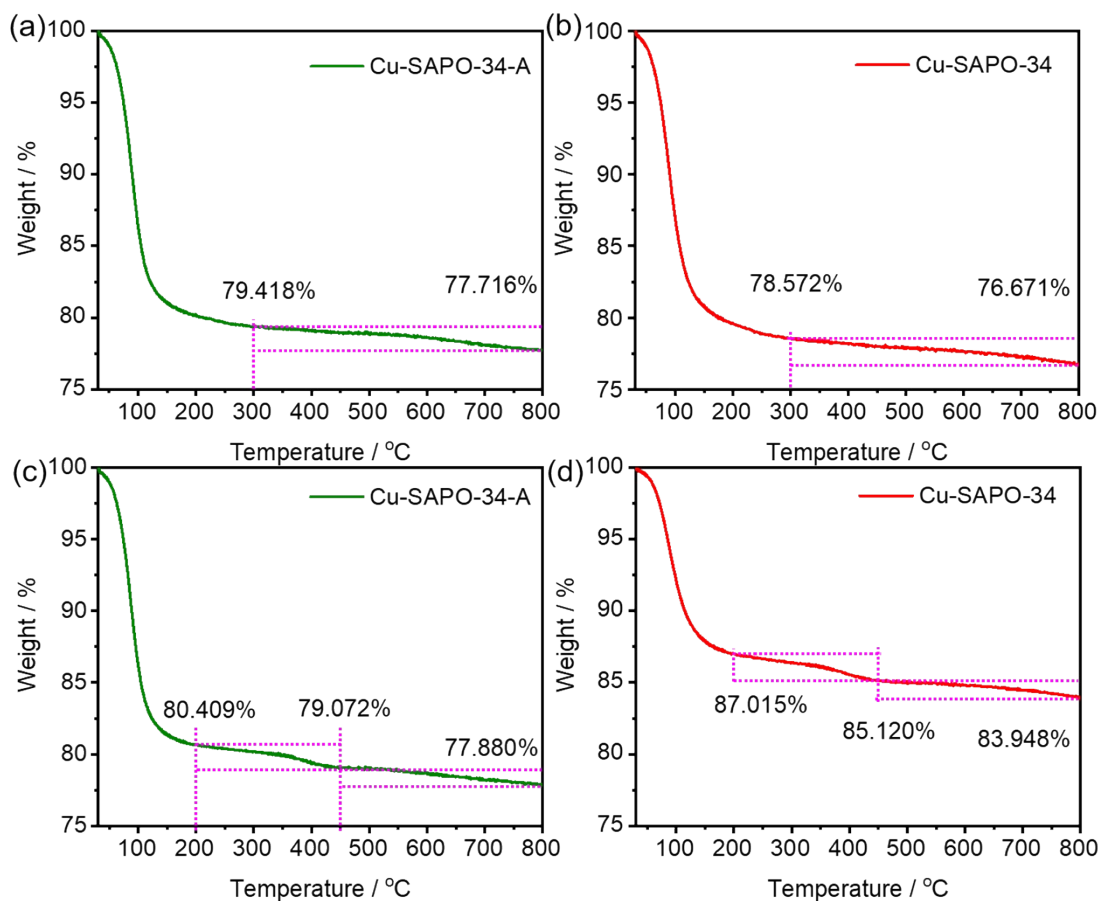

Figure S15. TG plots of Cu-SAPO-34-A (a) and Cu-SAPO-34 (b) catalysts poisoned in  $\text{SO}_2+\text{H}_2\text{O}+\text{O}_2$  feed; TG plots of Cu-SAPO-34-A (c) and Cu-SAPO-34 (d) catalysts poisoned in  $\text{SO}_2+\text{NH}_3+\text{H}_2\text{O}+\text{O}_2$  feed.

Firstly, the Cu-SAPO-34-A and Cu-SAPO-34 is  $\text{SO}_2$ -poisoned in a feed containing only  $\text{SO}_2+\text{H}_2\text{O}+\text{O}_2$ . Since there is no  $\text{NH}_3$ , only metal sulfate species are produced in this process. Preliminary calculations show that the amount of metal sulfate species produced on the Cu-SAPO-34-A and Cu-SAPO-34 is 17.0 mg/g and 19.0 mg/g, respectively (Figure S15a, S15b, Table S5). Afterwards, to further investigate the amount of produced ABS, the Cu-SAPO-34-A and Cu-SAPO-34 is  $\text{SO}_2$  poisoned in an

$\text{NH}_3+\text{SO}_2+\text{O}_2+\text{H}_2\text{O}$  feed. Since ABS decomposes between 250~400 °C, the decomposition temperature of metal sulfate is higher than 500 °C. Therefore, from the loss of TG at different temperatures, it can be concluded that the production of ABS and metal sulfate species on the Cu-SAPO-34-A are 13.4 mg/g and 11.9 mg/g; while the production of ABS and metal sulfate species on the Cu-SAPO-34 are 19.0 mg/g and 11.9 mg/g (Figure S15c, S15d, Table S5). Cu-SAPO-34-A with more sulfur-phobic  $\text{Z}_2\text{Cu}$  sites generates less sulfate species than Cu-SAPO-34 under two different sulfation conditions of  $\text{SO}_2+\text{O}_2+\text{H}_2\text{O}$  and  $\text{NH}_3+\text{SO}_2+\text{O}_2+\text{H}_2\text{O}$ . The formation of less sulfate species makes Cu-SAPO-34-A have more excellent resistance to  $\text{SO}_2$  poisoning.

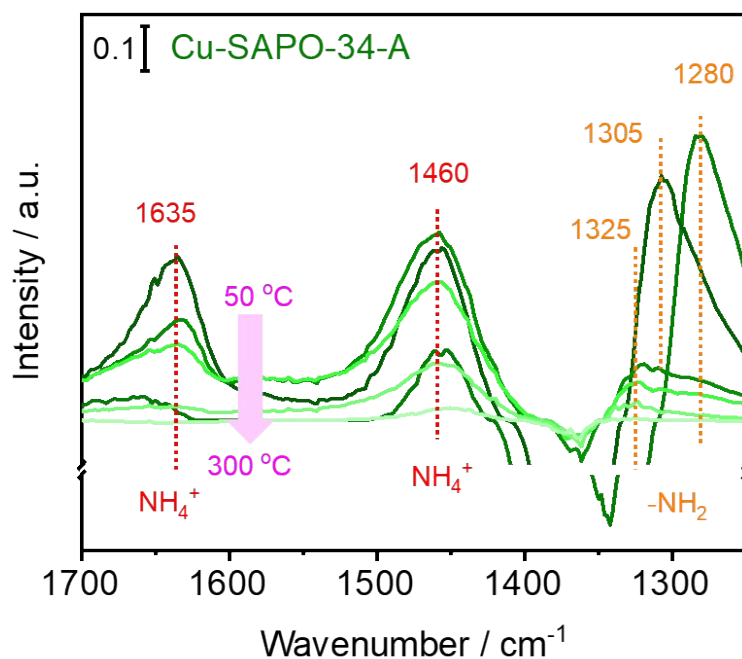

Figure S16. *In situ* DRIFTS of  $\text{NH}_3$  desorption over Cu-SAPO-34-A catalyst as a function of temperature.

Firstly, the desorption behavior of  $\text{NH}_4^+$  species and  $-\text{NH}_2$  species under different temperature was compared by *in situ* absorption and desorption of  $\text{NH}_3$ . The ammonia species adsorbed on the Cu-SAPO-34-A mainly exist as  $-\text{NH}_2$  (1280, 1305, 1325  $\text{cm}^{-1}$ ) and  $\text{NH}_4^+$  (1460, 1635  $\text{cm}^{-1}$ )<sup>13-17</sup>. The  $-\text{NH}_2$  species adsorbed at 1280  $\text{cm}^{-1}$  are classified as  $[\text{Cu}^{2+}(\text{NH}_3)_4]^{2+}$ , indicating that  $\text{NH}_3$  could be adsorbed on the  $\text{Z}_2\text{Cu}$  sites. It can be seen from Figure S16 that as the temperatures increases, the peak at 1280  $\text{cm}^{-1}$  shifts to a high wavenumber of 1305  $\text{cm}^{-1}$ , or even to 1325  $\text{cm}^{-1}$ . The adsorbed ammonia species at 1460  $\text{cm}^{-1}$  represents the formation of  $\text{NH}_4^+$  derived from  $\text{NH}_3$  solvation. The formation of this solvated  $\text{NH}_4^+$  species is coordinated with the Cu site of the Cu-CHA catalyst to enhance the mobility of the Cu site, so that the Cu-CHA catalyst maintains

excellent activity at low temperatures. The absorption peak of the  $\text{NH}_4^+$  species at  $1630\text{ cm}^{-1}$  represents N-H bend of  $\text{Cu-NH}_3$ , which can be inferred to be the ammonia species adsorbed on the  $\text{ZCuOH}$  sites ( $\text{ZCuOH}(\text{NH}_3)_3$ ). It is interesting that the absorption peak of  $\text{NH}_4^+$  species here also shifts to high wavenumbers as the temperature rises.



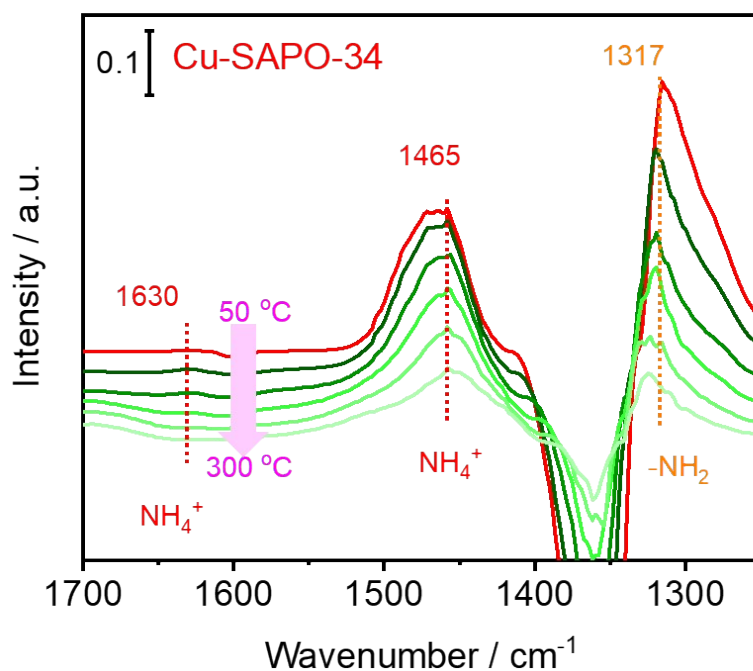

Figure S17. *In situ* DRIFTS of  $\text{NH}_3$  desorption over Cu-SAPO-34 catalyst as a function of temperature.

Firstly, the desorption behavior of  $\text{NH}_4^+$  species and  $-\text{NH}_2$  species under different temperatures was compared by *in situ* absorption and desorption of  $\text{NH}_3$ . The ammonia species adsorbed on the Cu-SAPO-34 are mainly  $-\text{NH}_2$  ( $1317 \text{ cm}^{-1}$ ) and  $\text{NH}_4^+$  ( $1465$ ,  $1630 \text{ cm}^{-1}$ ). The  $-\text{NH}_2$  species adsorbed at  $1280 \text{ cm}^{-1}$  is classified as  $[\text{Cu}^{2+}(\text{NH}_3)_4]^{2+}$ , indicating that it is ammonia adsorbed on the  $\text{Z}_2\text{Cu}$  sites. Comparing the  $\text{NH}_3$  adsorption and desorption experiments of Cu-SAPO-34-A and Cu-SAPO-34, it is known that as the temperature increases, the  $-\text{NH}_2$  species are easily desorbed. When the  $-\text{NH}_2$  species desorbs more than half of it, the  $\text{NH}_4^+$  species begins to desorb.

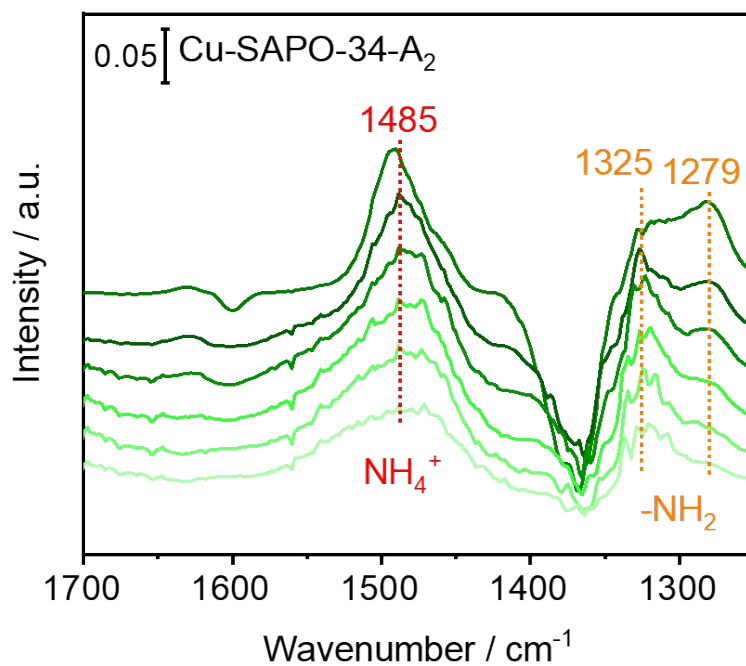

Figure S18. In situ DRIFTS of NH<sub>3</sub> desorption over Cu-SAPO-34-A<sub>2</sub> catalyst as a function of temperature.

The ammonia species adsorbed on Cu-SAPO-34-A<sub>2</sub> mainly exist in the form of NH<sub>4</sub><sup>+</sup> (1485 cm<sup>-1</sup>) and -NH<sub>2</sub> (1325 and 1279 cm<sup>-1</sup>) (Figure S18). As the desorption temperature rises to 300 °C, the ammonia species are basically consumed, indicating that the ammonia species adsorbed on Cu-SAPO-34-A<sub>2</sub> has high reactivity.

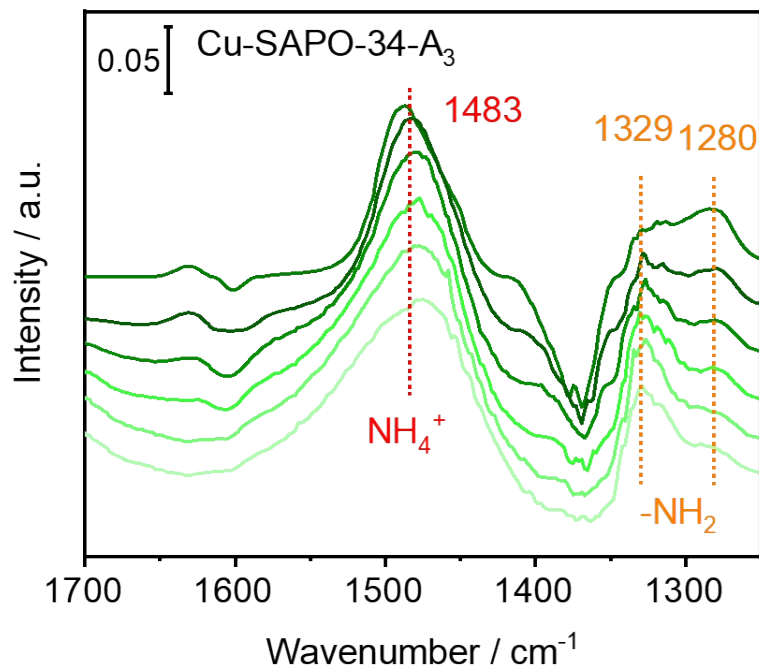

Figure S19. In situ DRIFTS of  $\text{NH}_3$  desorption over Cu-SAPO-34- $\text{A}_3$  catalyst as a function of temperature.

Figure S19 shows that the ammonia species on Cu-SAPO-34- $\text{A}_3$  also exist in the form of  $\text{NH}_4^+$  ( $1483 \text{ cm}^{-1}$ ) and  $-\text{NH}_2$  ( $1329$  and  $1280 \text{ cm}^{-1}$ ), but with the increase of desorption temperature,  $-\text{NH}_2$  species have a certain amount of desorption, and  $\text{NH}_4^+$  species have only a small amount of desorption. It is shown that the reactivity of ammonia species adsorbed on Cu-SAPO-34- $\text{A}_3$  is poor due to ultra-high hydrothermal aging temperature ( $900 \text{ }^\circ\text{C}$ ).

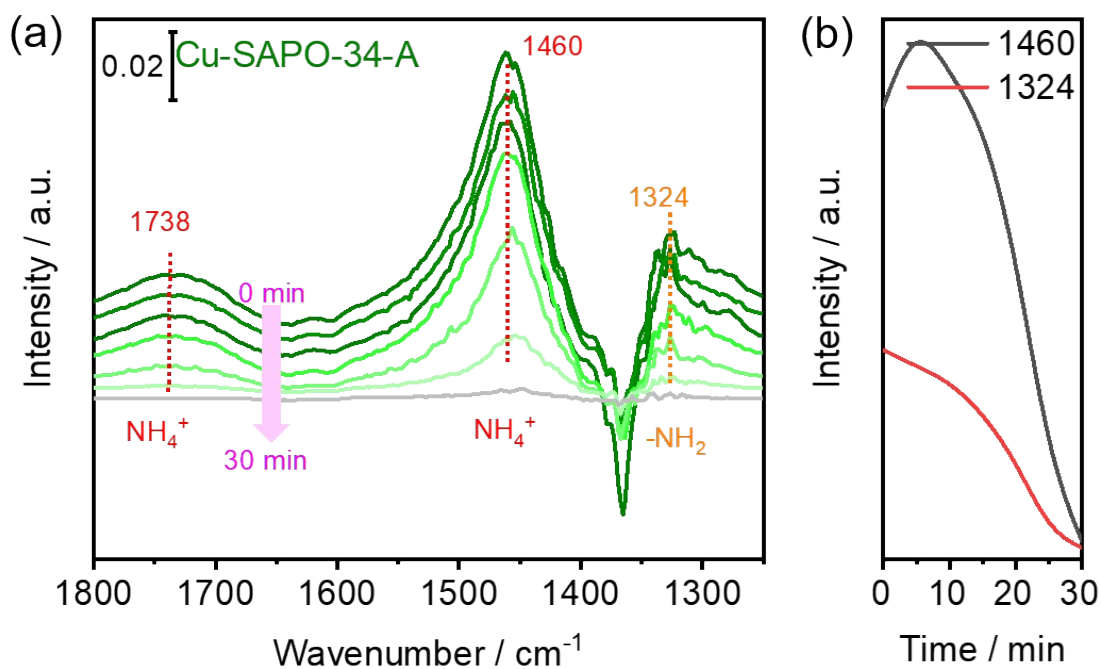

Figure S20. *In situ* DRIFTS of the transient reactions at 250 °C over Cu-SAPO-34-A catalyst between  $\text{NO}+\text{O}_2$  (a) and preadsorbed  $\text{NH}_3$  as a function of time. (b) Consumption of the bands at 1324  $\text{cm}^{-1}$  and 1460  $\text{cm}^{-1}$  over Cu-SAPO-34-A catalyst in Figure (a).

Firstly, the Cu-SAPO-34-A is adsorbed at 250 °C for 30 min of  $\text{NH}_3$ , and then  $\text{NO}+\text{O}_2$  is introduced to react. After the Cu-SAPO-34-A adsorbs  $\text{NH}_3$ , it can be learned when  $\text{NO}+\text{O}_2$  is introduced, that the  $-\text{NH}_2$  species (1324  $\text{cm}^{-1}$ ) and the  $\text{NH}_4^+$  species (1460  $\text{cm}^{-1}$ ) are consumed rapidly as the reaction time increases, until the reaction is complete. By the way, the short-term rise of the  $\text{NH}_4^+$  species may be due to the re-adsorption of a small amount of desorbed ammonia species (Figure S20a, 20b).

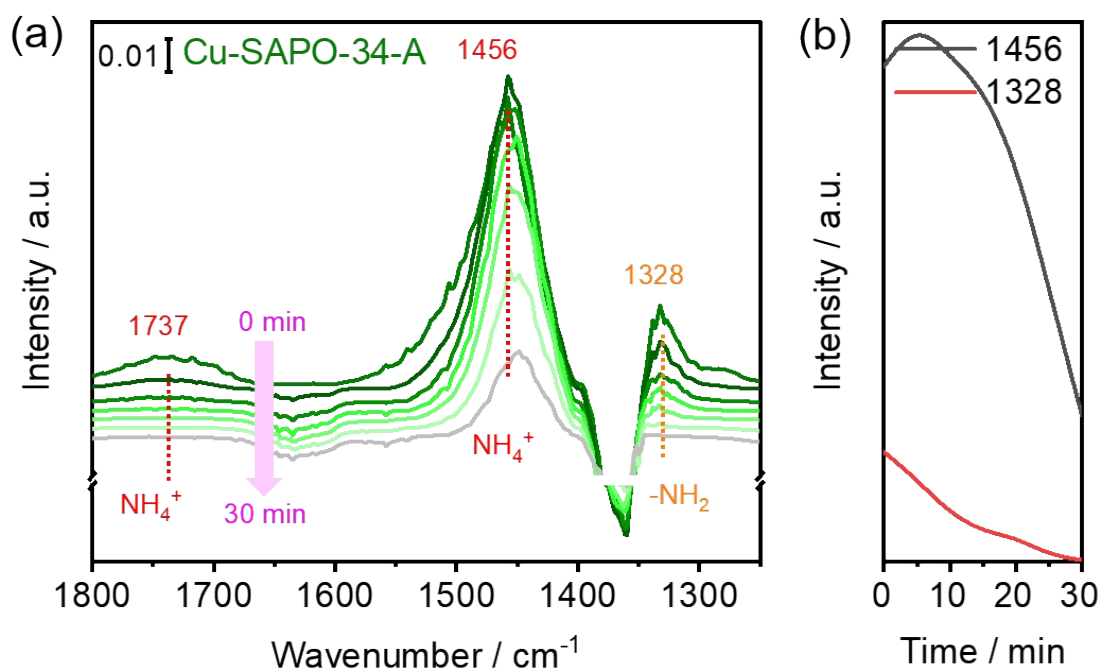

Figure S21. *In situ* DRIFTS of the transient reactions at 250 °C over Cu-SAPO-34-A catalyst between  $\text{NO}+\text{SO}_2+\text{O}_2$  (a) and preadsorbed  $\text{NH}_3$  as a function of time. (b) Consumption of the bands at 1328  $\text{cm}^{-1}$  and 1456  $\text{cm}^{-1}$  over Cu-SAPO-34-A catalysts in Figure (a).

Firstly, the Cu-SAPO-34-A is adsorbed at 250 °C for 30 min of  $\text{NH}_3$ , and then  $\text{NO}+\text{SO}_2+\text{O}_2$  is introduced to react. When the Cu-SAPO-34-A is reacted with  $\text{SO}_2+\text{NO}+\text{O}_2$  after adsorbing  $\text{NH}_3$ , the  $-\text{NH}_2$  species (1328  $\text{cm}^{-1}$ ) still has a high reaction rate and the reaction is completed quickly; while the  $\text{NH}_4^+$  species (1456  $\text{cm}^{-1}$ ) can also participate in the reaction, but the reaction rate becomes slower and unable to react completely (Figure S21a, 21b).

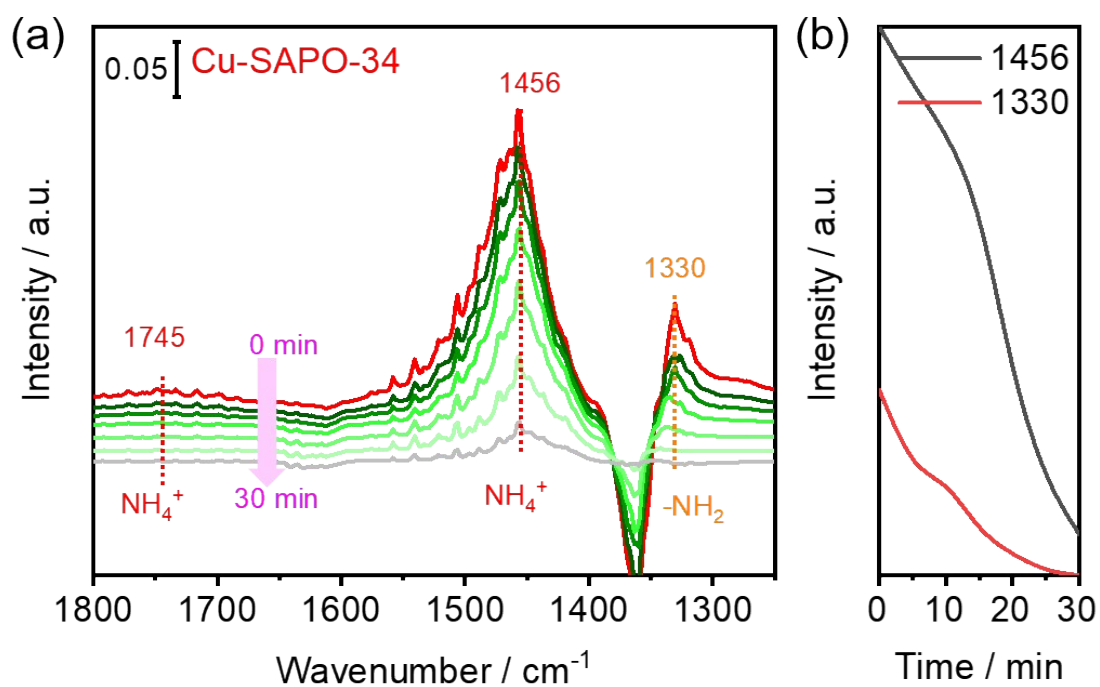

Figure S22. *In situ* DRIFTS of the transient reactions at 250 °C over Cu-SAPO-34 catalyst between NO+O<sub>2</sub> (a) and preadsorbed NH<sub>3</sub> as a function of time. (b) Consumption of the bands at 1330  $\text{cm}^{-1}$  and 1456  $\text{cm}^{-1}$  over Cu-SAPO-34 catalyst in Figure (a).

After the Cu-SAPO-34 adsorbs NH<sub>3</sub> and then enters the NO+O<sub>2</sub> reaction, it can also be detected that the -NH<sub>2</sub> species (1330  $\text{cm}^{-1}$ ) and the NH<sub>4</sub><sup>+</sup> species (1456  $\text{cm}^{-1}$ ) react quickly to complete consumption as the reaction time increases (Figure S22a, 22b).

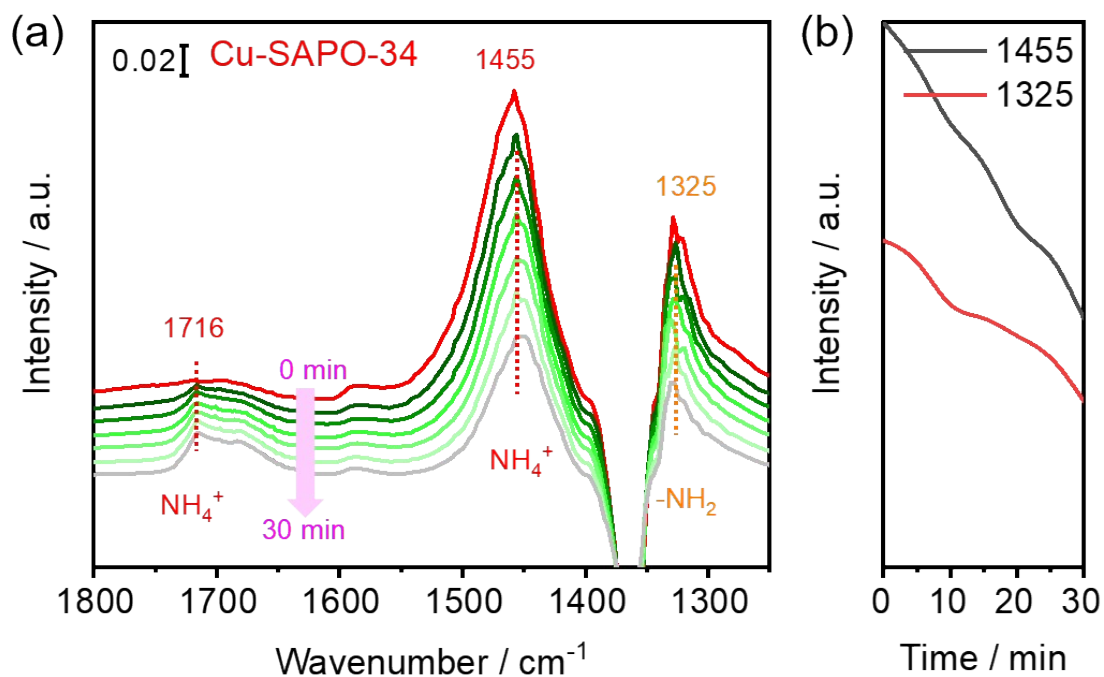

Figure S23. *In situ* DRIFTS of the transient reactions at 250 °C over Cu-SAPO-34 catalyst between  $\text{NO}+\text{SO}_2+\text{O}_2$  (a) and preadsorbed  $\text{NH}_3$  as a function of time. (b) Consumption of the bands at 1325  $\text{cm}^{-1}$  and 1455  $\text{cm}^{-1}$  over Cu-SAPO-34 catalyst in Figure (a).

When the reaction of  $\text{NO}+\text{SO}_2+\text{O}_2$  is introduced after the adsorption of  $\text{NH}_3$ , the reactivity of the  $-\text{NH}_2$  species (1325  $\text{cm}^{-1}$ ) and the  $\text{NH}_4^+$  species (1455  $\text{cm}^{-1}$ ) is inhibited (Figure S23a, 23b).

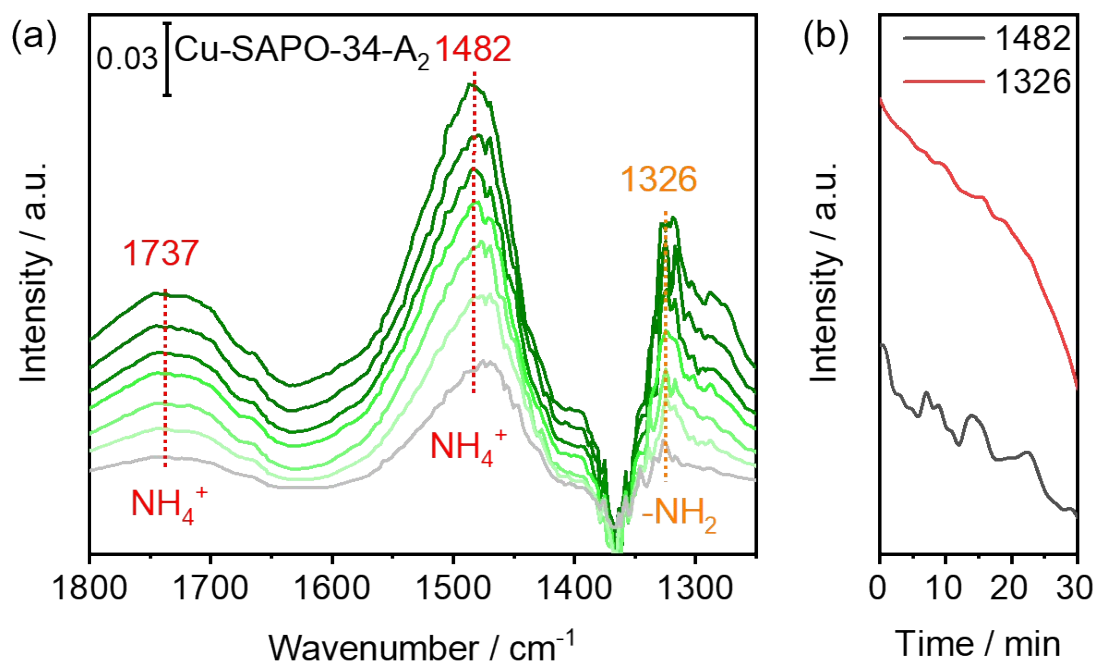

Figure S24. In situ DRIFTS of the transient reactions at 250 °C over Cu-SAPO-34-A<sub>2</sub> catalyst between NO+O<sub>2</sub> (a) and preadsorbed NH<sub>3</sub> as a function of time. (b) Consumption of the bands at 1326  $\text{cm}^{-1}$  and 1482  $\text{cm}^{-1}$  over Cu-SAPO-34-A<sub>2</sub> catalyst in Figure (a).

Figure S24 shows that the ammonia species on Cu-SAPO-34-A<sub>2</sub> are gradually consumed after the introduction of NO+O<sub>2</sub>. After 30 minutes of reaction, the -NH<sub>2</sub> species are basically consumed completely, and the NH<sub>4</sub><sup>+</sup> species consume nearly two thirds.



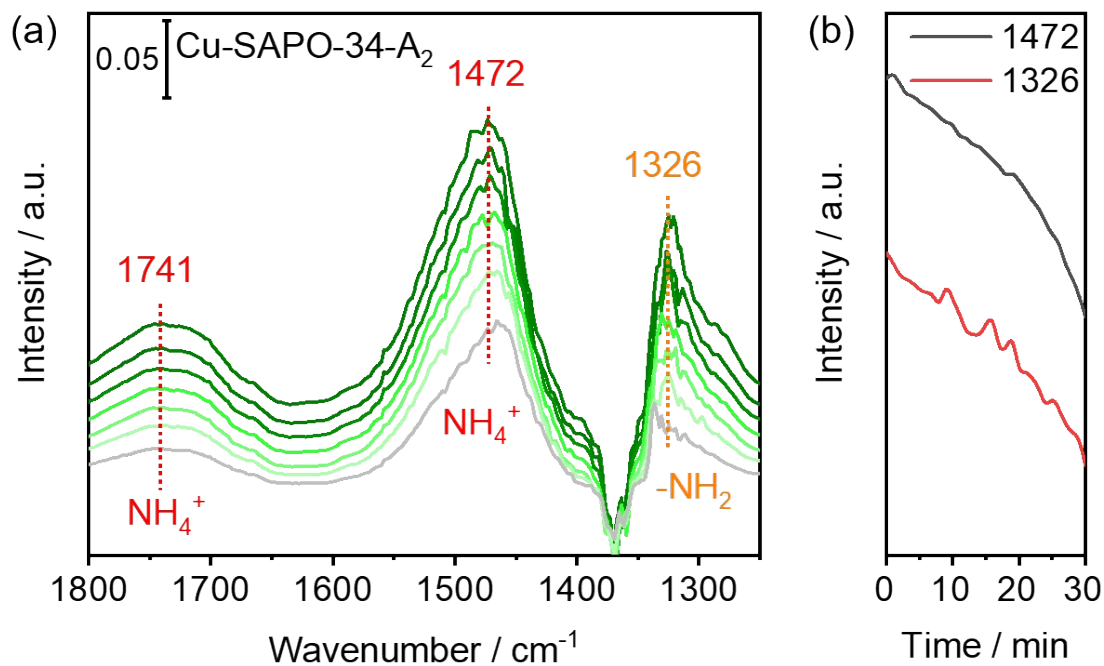

Figure S25. In situ DRIFTS of the transient reactions at 250 °C over Cu-SAPO-34-A<sub>2</sub> catalyst between NO+SO<sub>2</sub>+O<sub>2</sub> (a) and preadsorbed NH<sub>3</sub> as a function of time. (b) Consumption of the bands at 1326 cm<sup>-1</sup> and 1472 cm<sup>-1</sup> over Cu-SAPO-34-A<sub>2</sub> catalyst in Figure (a).

The reaction activity of -NH<sub>2</sub> and NH<sub>4</sub><sup>+</sup> species was inhibited when NO+SO<sub>2</sub>+O<sub>2</sub> was introduced into Cu-SAPO-34-A<sub>2</sub> after absorbing NH<sub>3</sub> (Figure S24). After 30 minutes of reaction, -NH<sub>2</sub> species consumed nearly two-thirds, while NH<sub>4</sub><sup>+</sup> species consumed only half.

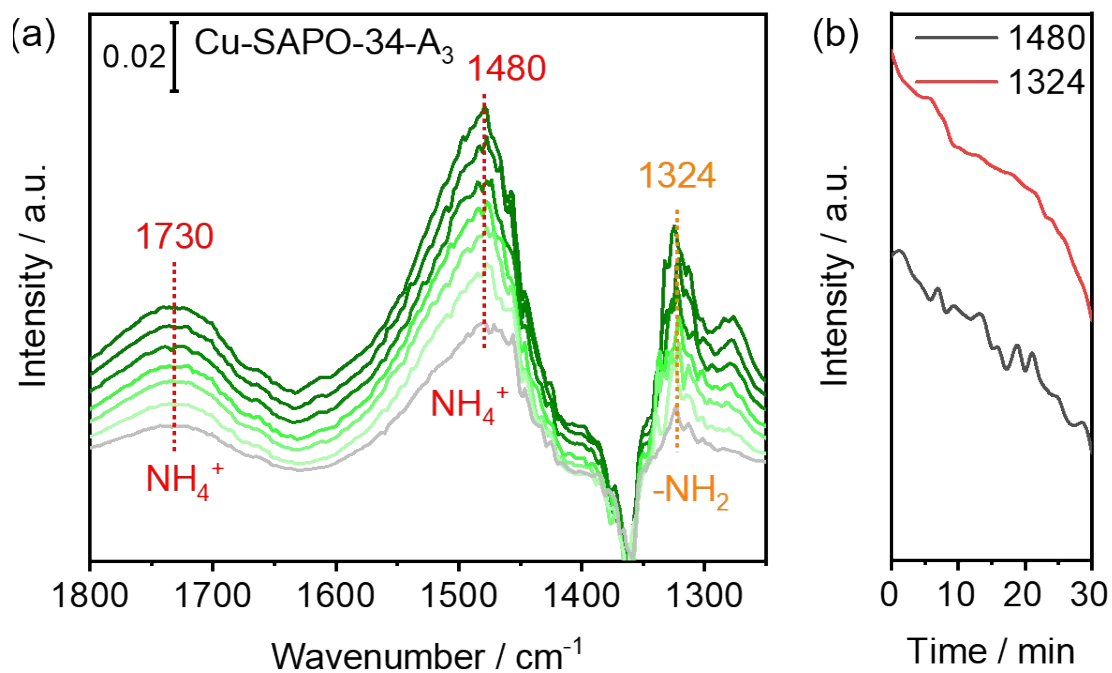

Figure S26. In situ DRIFTS of the transient reactions at 250 °C over Cu-SAPO-34- $\text{A}_3$  catalyst between  $\text{NO}+\text{O}_2$  (a) and preadsorbed  $\text{NH}_3$  as a function of time. (b) Consumption of the bands at  $1324$   $\text{cm}^{-1}$  and  $1480$   $\text{cm}^{-1}$  over Cu-SAPO-34- $\text{A}_3$  catalyst in Figure (a).

Figure S26 shows that the ammonia species adsorbed on Cu-SAPO-34- $\text{A}_3$  is slowly consumed after the introduction of  $\text{NO}+\text{O}_2$ . After 30 minutes of reaction, the  $-\text{NH}_2$  species consume two-thirds and the  $\text{NH}_4^+$  species only half.

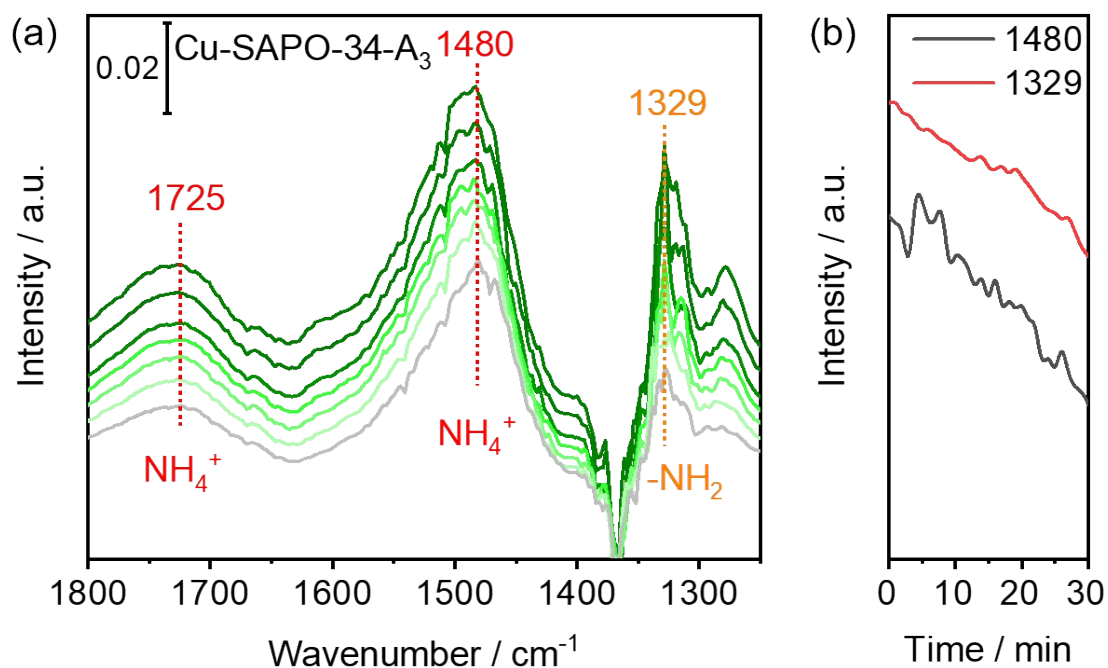

Figure S27. In situ DRIFTS of the transient reactions at 250 °C over Cu-SAPO-34-A<sub>3</sub> catalyst between NO+SO<sub>2</sub>+O<sub>2</sub> (a) and preadsorbed NH<sub>3</sub> as a function of time. (b) Consumption of the bands at 1329 cm<sup>-1</sup> and 1480 cm<sup>-1</sup> over Cu-SAPO-34-A<sub>3</sub> catalyst in Figure (a).

When the reaction atmosphere is adjusted to NO+SO<sub>2</sub>+O<sub>2</sub>, the reactivity of -NH<sub>2</sub> and NH<sub>4</sub><sup>+</sup> is further inhibited (Figure S27). After 30 minutes of reaction, the consumption of -NH<sub>2</sub> species is less than two-thirds, and that of NH<sub>4</sub><sup>+</sup> species is only about one-third.

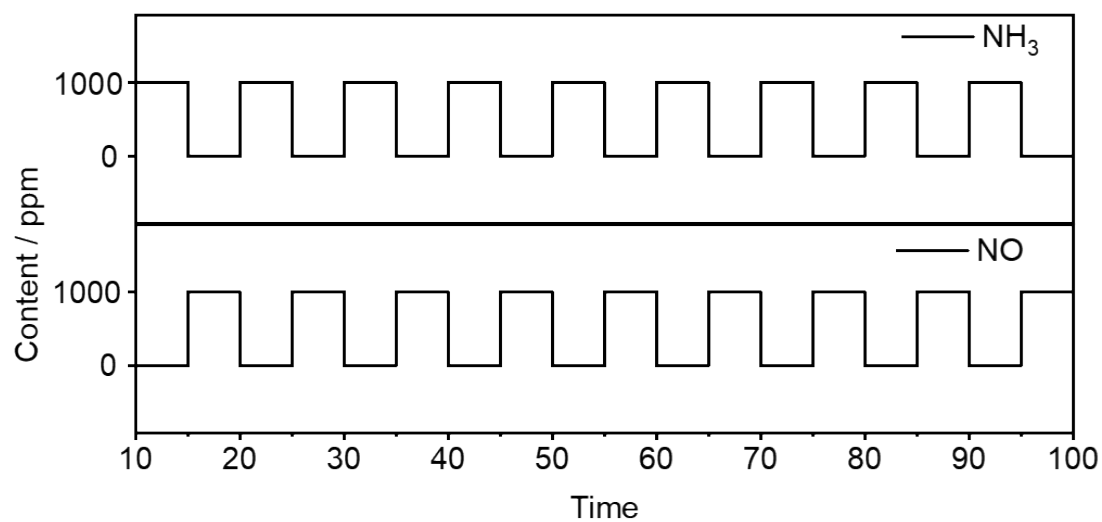

Figure S28. Schematic illustration of gases alternation for  $\text{NH}_3/\text{NO}$  in the pulsed DRIFTS experiments.

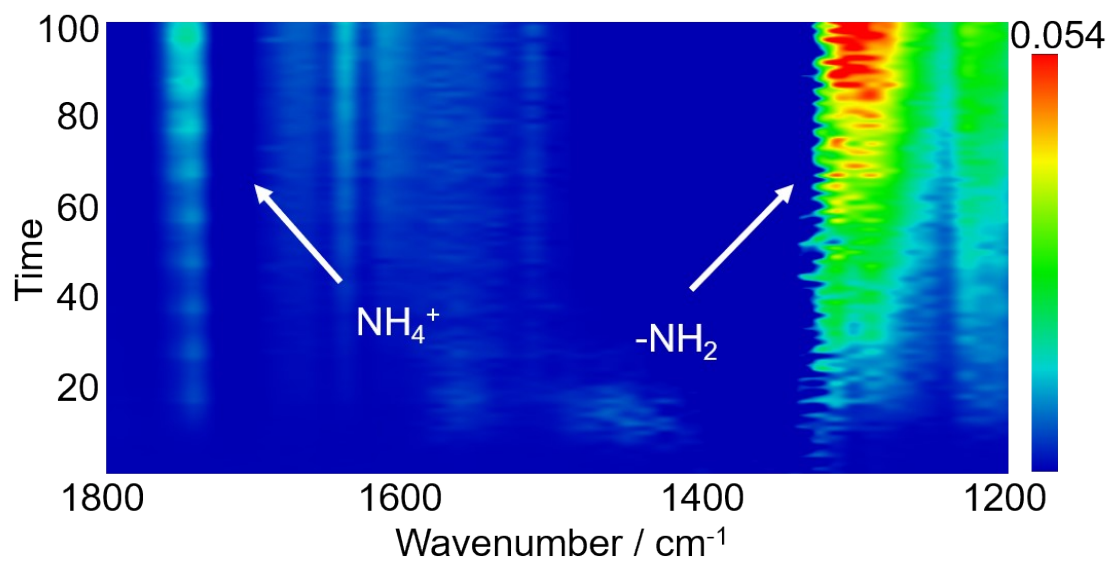

Figure S29. Mapping picture of pulse DRIFTS spectra of SO<sub>2</sub>-poisoned Cu-SAPO-34-A-S catalysts obtained at 250 °C before the pretreated at 300 °C.

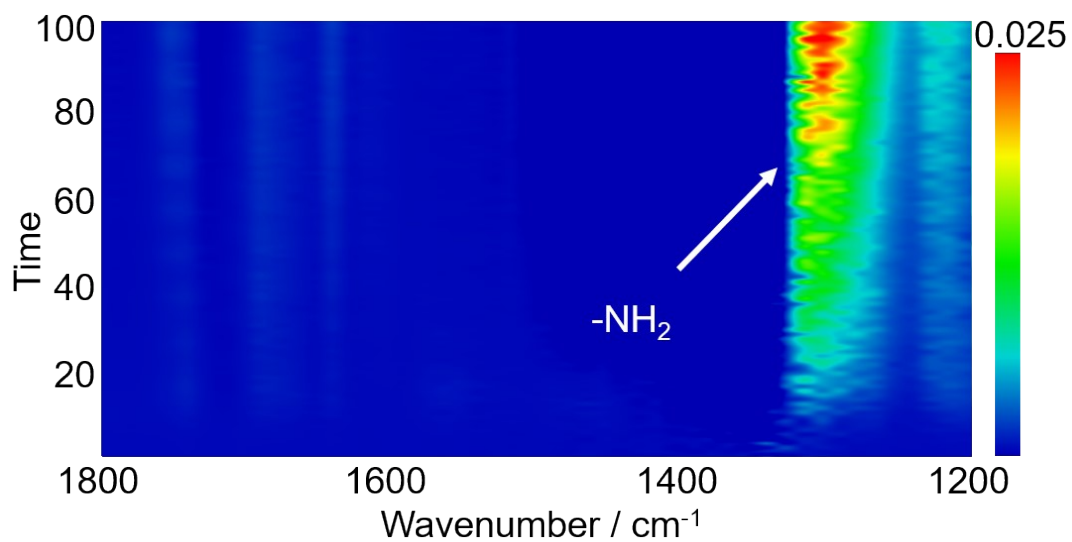

Figure S30. Mapping picture of pulse DRIFTS spectra of SO<sub>2</sub>-poisoned Cu-SAPO-34-S catalysts obtained at 250 °C before the pretreated at 300 °C.

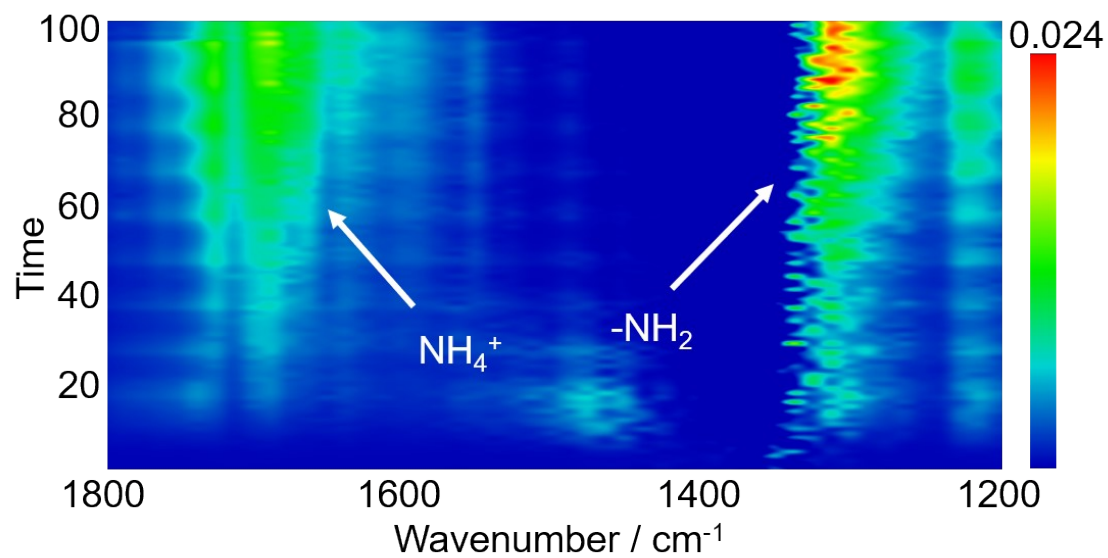

Figure S31. Mapping picture of pulse DRIFTS spectra of SO<sub>2</sub>-poisoned Cu-SAPO-34-A-S catalysts obtained at 250 °C before the pretreated at 350 °C.

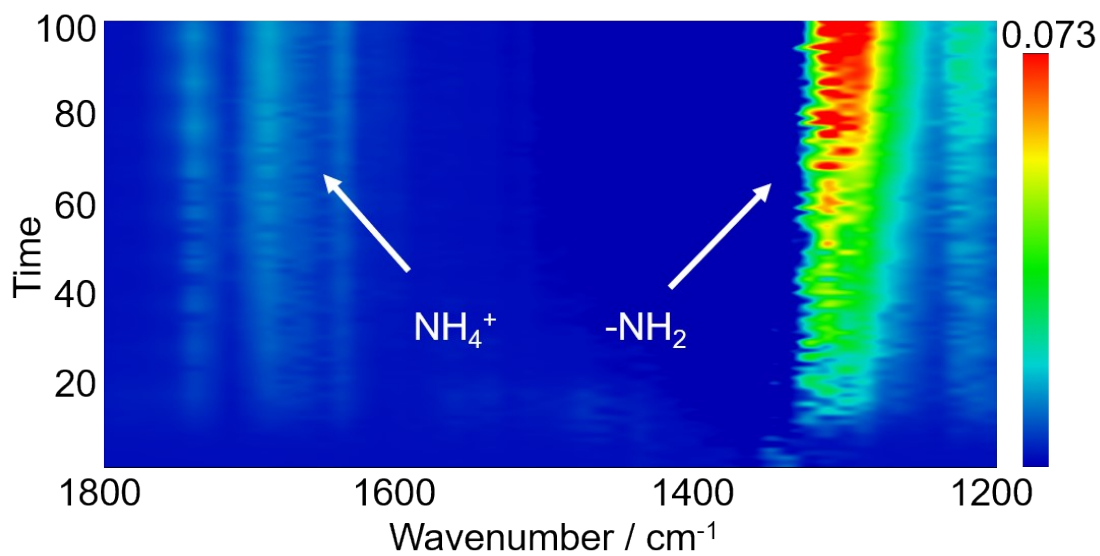

Figure S32. Mapping picture of pulse DRIFTS spectra of SO<sub>2</sub>-poisoned Cu-SAPO-34-S catalysts obtained at 250 °C before the pretreated at 350 °C.



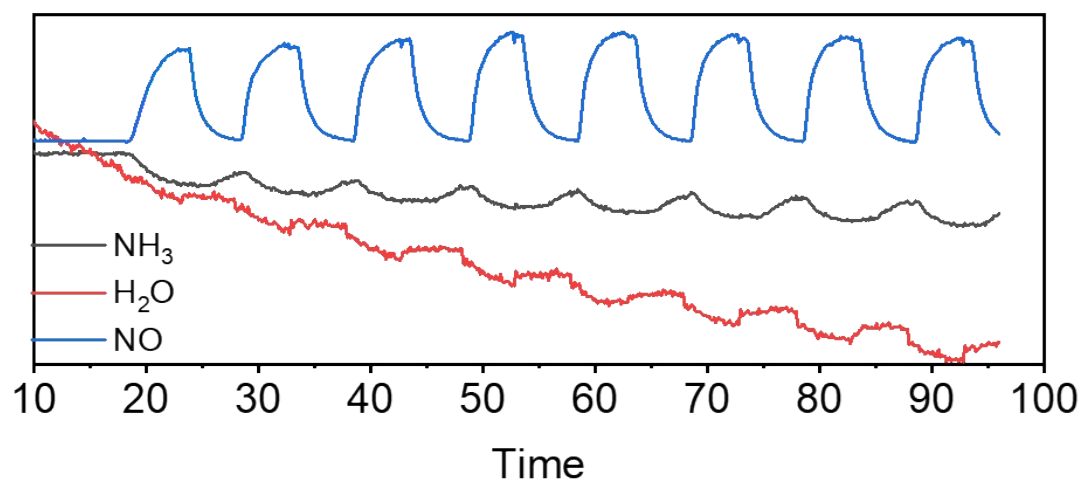

Figure S33. Mass spectrometry plots on NH<sub>3</sub>, NO and H<sub>2</sub>O versus time in the exhaust gas of pulse DRIFTS spectra of Cu-SAPO-34-A-S catalysts which were obtained at 250 °C before the pretreatment at 300 °C.

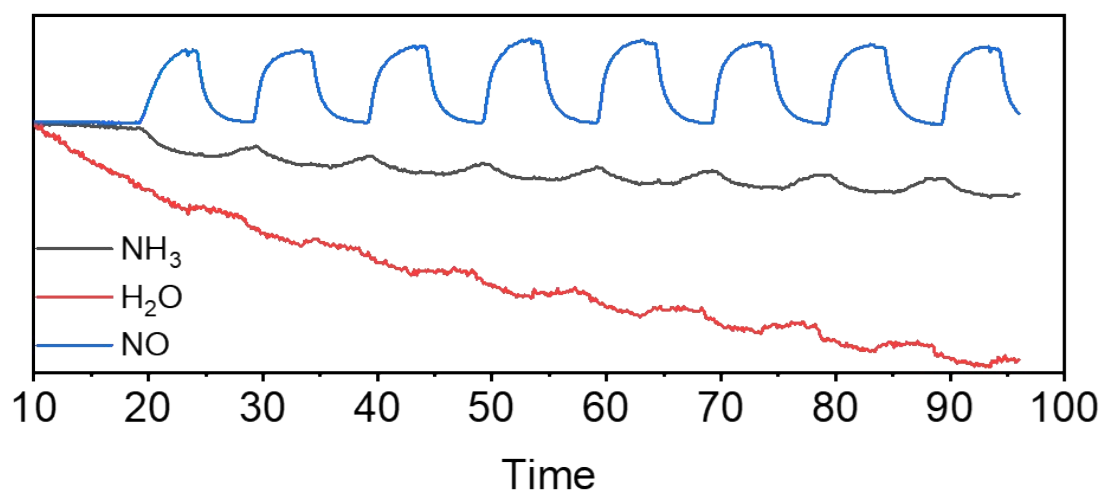

Figure S34. Mass spectrometry plots on NH<sub>3</sub>, NO and H<sub>2</sub>O versus time in the exhaust gas of pulse DRIFTS spectra of Cu-SAPO-34-S catalysts which were obtained at 250 °C before the pretreatment at 300 °C.

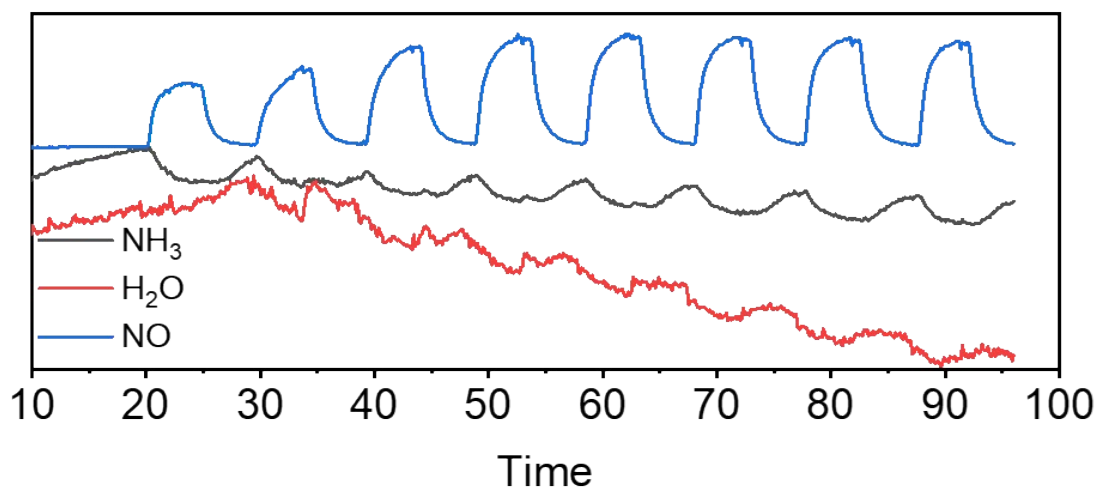

Figure S35. Mass spectrometry plots on NH<sub>3</sub>, NO and H<sub>2</sub>O versus time in the exhaust gas of pulse DRIFTS spectra of Cu-SAPO-34-A-S catalysts which were obtained at 250 °C before the pretreatment at 350 °C.

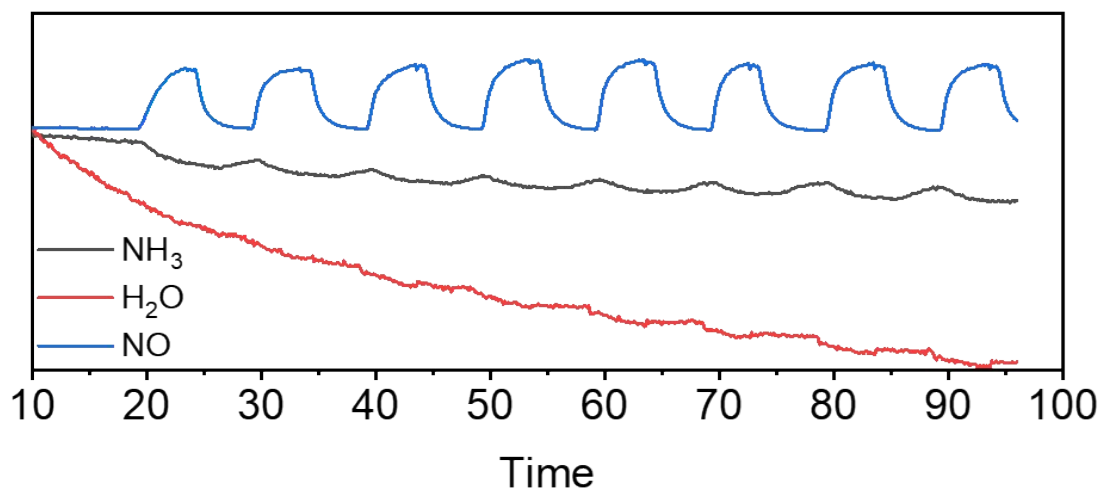

Figure S36. Mass spectrometry plots on NH<sub>3</sub>, NO and H<sub>2</sub>O versus time in the exhaust gas of pulse DRIFTS spectra of Cu-SAPO-34-S catalysts which were obtained at 250 °C before the pretreatment at 350 °C.

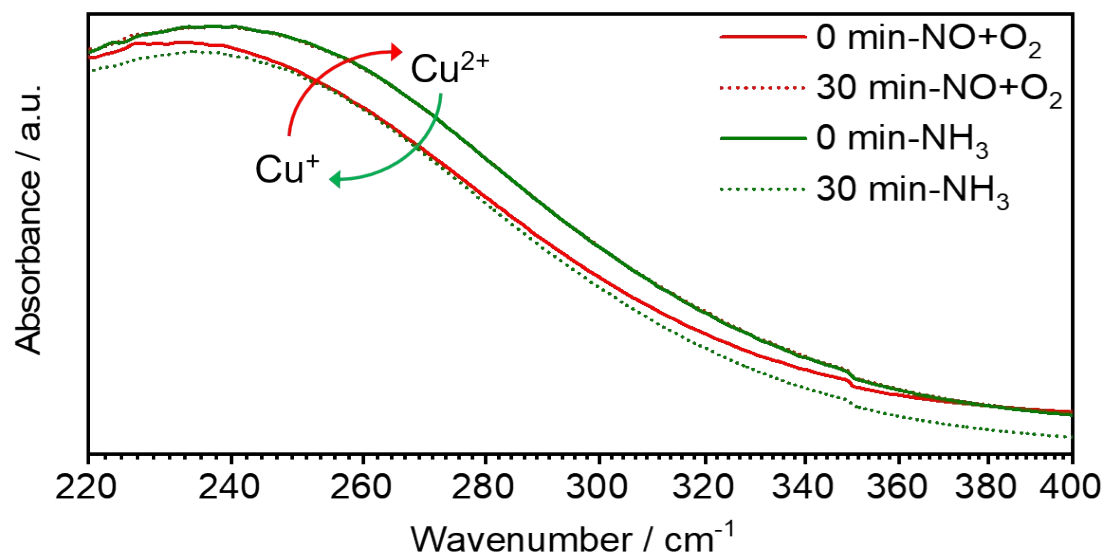

Figure S37. *In situ* UV-vis spectra of oxidation and reduction half-reaction of the Cu-SAPO-34-A catalyst at 250 °C. The oxidizing feed is 1000 ppm NO+O<sub>2</sub>, the reduction feed is 1000 ppm NH<sub>3</sub>.

In Figure S37, the Cu sites in the Cu-SAPO-34-A are oxidized to Cu<sup>II</sup> in the NO+O<sub>2</sub> atmosphere, and the oligonuclear [Cu-O-Cu]<sub>n</sub> species are more easily formed. After the introduction of NH<sub>3</sub>, the Cu<sup>II</sup> content drops to the initial state, and the oligonuclear [Cu-O-Cu]<sub>n</sub> species content also drops to the state of 0 min-NO+O<sub>2</sub>.

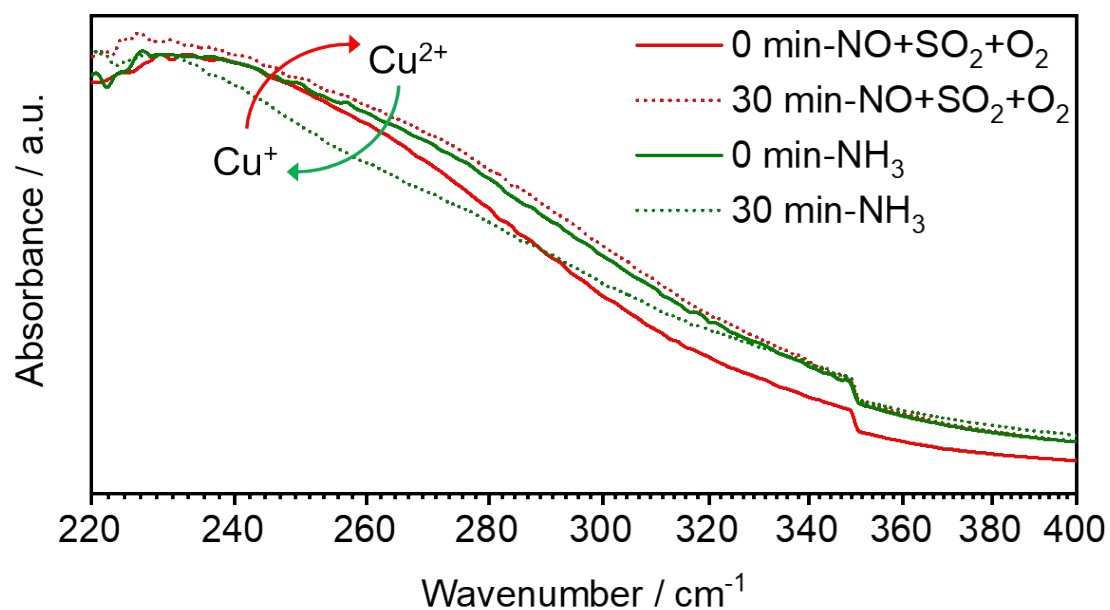

Figure S38. *In situ* UV-vis spectra of oxidation and reduction half-reaction of the Cu-SAPO-34-A catalyst at 250 °C. The oxidizing feed is 1000 ppm NO+1000 ppm SO<sub>2</sub>+O<sub>2</sub>, and the reduction feed is 1000 ppm NH<sub>3</sub>.

However, in Figure S38, the introduction of NO+SO<sub>2</sub>+O<sub>2</sub> cause Cu species to be oxidized to Cu<sup>II</sup>, the content of oligonuclear [Cu-O-Cu]<sub>n</sub> species increase, and subsequent NH<sub>3</sub> reduction also restore the original state.

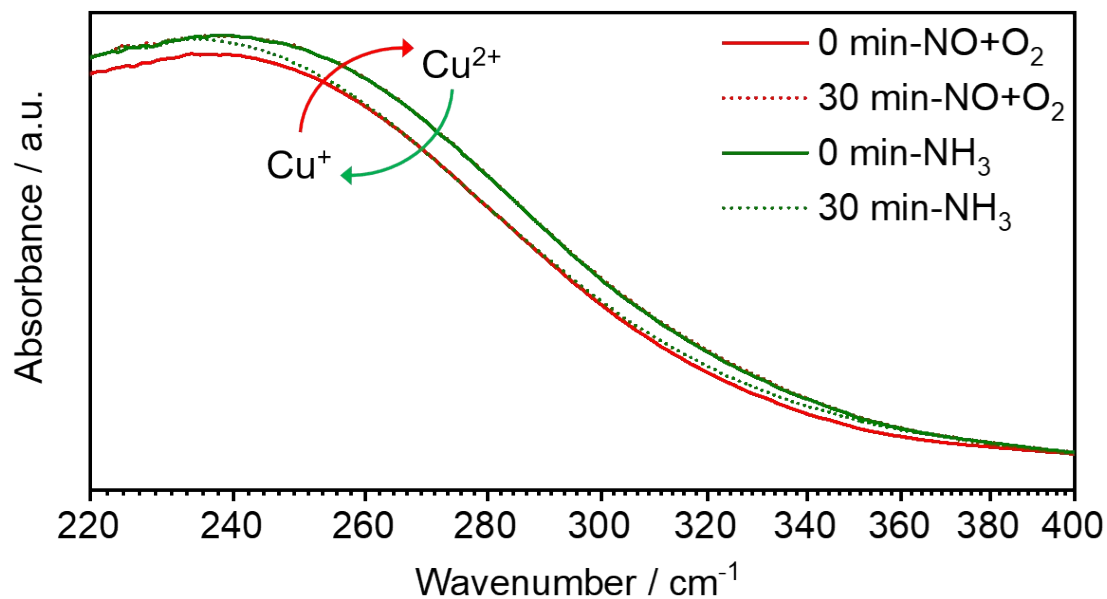

Figure S39. *In situ* UV-vis spectra of oxidation and reduction half-reaction of the Cu-SAPO-34 catalyst at 250 °C. The oxidizing feed is 1000 ppm NO+O<sub>2</sub>, the reduction feed is 1000 ppm NH<sub>3</sub>.

Figure S39 shows that on the Cu-SAPO-34, the Cu species are oxidized and polymerized under the NO+O<sub>2</sub> feed, and then reduced to the initial state in the NH<sub>3</sub> atmosphere. The oxidation and reduction reaction maintains a balance, thereby ensuring the efficiency of the SCR reaction.

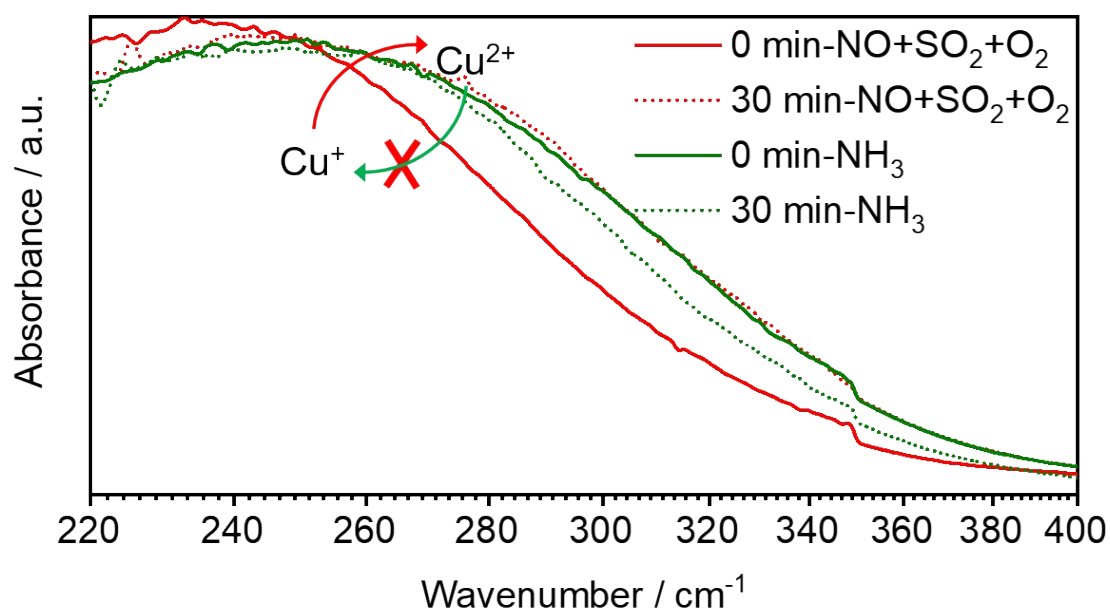

Figure S40. *In situ* UV-vis spectra of oxidation and reduction half-reaction of the Cu-SAPO-34 catalyst at 250 °C. The oxidizing feed is 1000 ppm NO+1000 ppm SO<sub>2</sub>+O<sub>2</sub>, the reduction feed is 1000 ppm NH<sub>3</sub>.

In Figure S40, the Cu sites on the Cu-SAPO-34 are oxidized to Cu<sup>II</sup> sites in the feed of NO+SO<sub>2</sub>+O<sub>2</sub>. Compared with Figure S39, it can be observed that the content of Cu<sup>II</sup> sites is greatly increased, indicating that the introduction of SO<sub>2</sub> has strengthened the oxidation of oxidizing atmosphere (NO+SO<sub>2</sub>+O<sub>2</sub>). This also makes it difficult to reduce Cu<sup>II</sup> and oligonuclear [Cu-O-Cu]<sub>n</sub> species after the subsequent introduction of NH<sub>3</sub>.

Table S1. The content of Z<sub>2</sub>Cu and ZCuOH sites in Cu-SAPO-34 and Cu-SAPO-34-A catalysts calibrated by H<sub>2</sub>-TPR and ammonia titration.

| The content | The content of | The content | The content of |
|-------------|----------------|-------------|----------------|
|-------------|----------------|-------------|----------------|



|              | of $Z_2Cu$ / % <sup>a</sup> | $ZCuOH$ / % <sup>a</sup> | of $Z_2Cu$ / % <sup>b</sup> | $ZCuOH$ / % <sup>b</sup> |
|--------------|-----------------------------|--------------------------|-----------------------------|--------------------------|
| Cu-SAPO-34   | 10.1                        | 89.9                     | 10.0                        | 90.0                     |
| Cu-SAPO-34-A | 23.4                        | 76.6                     | 23.5                        | 76.5                     |

<sup>a\*</sup> represents the data of  $H_2$ -TPR, and <sup>b\*</sup> represents the data of ammonia titration method.

Table S2. O, Al, Cu and S elements content in Cu-SAPO-34, Cu-SAPO-34-A, Cu-SAPO-34-S and Cu-SAPO-34-A-S catalysts.

|                | O/%  |      | Al/% |      | Cu/% |     | S/% |     |
|----------------|------|------|------|------|------|-----|-----|-----|
|                | a*   | b*   | a*   | b*   | a*   | b*  | a*  | b*  |
| Cu-SAPO-34     | 60.4 | 56.1 | 18   | 19.0 | 2.6  | 1.7 | /   | /   |
| Cu-SAPO-34-A   | 59.2 | 55   | 18.1 | 20.4 | 2.0  | 1.6 | /   | /   |
| Cu-SAPO-34-S   | 60.8 | 56.8 | 17.4 | 19.4 | 2.1  | 1.7 | 0.6 | 0.5 |
| Cu-SAPO-34-A-S | 59.2 | 57.6 | 18.1 | 18.6 | 1.8  | 1.8 | 0   | 0.3 |

a\* represents the data of flat scanning, and b\* represents the data of EDX.

Table S3. The specific breakthrough time and SO<sub>2</sub> adsorption capacity of various catalysts.

|              | 200 °C                 |                                                      | 300 °C                 |                                                      |
|--------------|------------------------|------------------------------------------------------|------------------------|------------------------------------------------------|
|              | Break through time / s | SO <sub>2</sub> ads- capacity / mmol·g <sup>-1</sup> | Break through time / s | SO <sub>2</sub> ads- capacity / mmol·g <sup>-1</sup> |
| Cu-SAPO-34   | 83.7                   | 0.050                                                | 84.7                   | 0.030                                                |
| Cu-SAPO-34-A | 66.0                   | 0.032                                                | 32.0                   | 0.020                                                |

Table S4. Adsorption energy and adsorption distance of NH<sub>3</sub>, NO, SO<sub>2</sub> and competitive adsorption of NO with SO<sub>2</sub>.

|                   | NH <sub>3</sub> |           | NO         |           | SO <sub>2</sub> |                    | NO and SO <sub>2</sub> |                              |
|-------------------|-----------------|-----------|------------|-----------|-----------------|--------------------|------------------------|------------------------------|
|                   | $\alpha^*$      | $\beta^*$ | $\alpha^*$ | $\beta^*$ | $\alpha^*$      | $\beta^*$          | $\beta^*$ of NO        | $\beta^*$ of SO <sub>2</sub> |
| Z <sub>2</sub> Cu | -1.04           | 2.000     | -0.45      | 1.962     | -0.30           | 2.334              | 1.961                  | 2.647                        |
| ZCuOH             | -1.05           | 2.005     | -0.22      | 3.581     | -0.53           | 1.948 <sup>1</sup> | 3.878                  | 1.973 <sup>1</sup>           |
|                   |                 |           |            |           |                 | 1.919 <sup>2</sup> |                        | 1.830 <sup>2</sup>           |

$\alpha^*$  represents the data of Adsorption energy (eV), and  $\beta^*$  represents the Adsorption distance (Å); <sup>1</sup> represents the data of the adsorption distance from the O atom of SO<sub>2</sub> to the Cu atom, and <sup>2</sup> represents the the adsorption distance from the S atom of SO<sub>2</sub> to the O atom.

Table S5. The deposition quality of sulfate species on Cu-SAPO-34-A and Cu-SAPO-34 catalysts.

|              | (The amount of sulfate /<br>mmol/g) <sup>1</sup> | (The amount of sulfate /<br>mmol/g) <sup>2</sup> |                       |
|--------------|--------------------------------------------------|--------------------------------------------------|-----------------------|
|              | metal sulfate species                            | ABS                                              | metal sulfate species |
| Cu-SAPO-34   | 19.0                                             | 19.0                                             | 11.9                  |
| Cu-SAPO-34-A | 17.0                                             | 13.4                                             | 11.9                  |

<sup>1</sup> represents the sulfation condition of SO<sub>2</sub>+O<sub>2</sub>, as shown in Figure S11a, S11b;

<sup>2</sup> represents the sulfation condition of SO<sub>2</sub>+NH<sub>3</sub>+O<sub>2</sub>, as shown in Figure S 11c, 11d.

## References

1. J. P. Perdew, K. Burke and M. Ernzerhof, Generalized gradient approximation made simple *Phys. Rev. Lett*, 1997, **78**, 1396-1396.
2. G. Kresse and J. Hafner, Ab initio molecular dynamics for liquid metals, *Phys. Rev. B*, 1993, **47**, 558-561.
3. N. Troullier and J. L. Martins, Efficient pseudopotentials for plane-wave calculations, *Phys. Rev. B*, 1991, **43**, 1993-2006.
4. Y. Jangjou, Q. Do, Y. Gu, L.-G. Lim, H. Sun, D. Wang, A. Kumar, J. Li, L. C. Grabow and W. S. Epling, Nature of Cu Active Centers in Cu-SSZ-13 and Their Responses to SO<sub>2</sub> Exposure, *ACS Catalysis*, 2018, **8**, 1325-1337.
5. W. Su, Z. Li, Y. Peng and J. Li, Correlation of the changes in the framework and active Cu sites for typical Cu/CHA zeolites (SSZ-13 and SAPO-34) during hydrothermal aging, *Phys Chem Chem Phys*, 2015, **17**, 29142-29149.
6. Y. Wan, G. Yang, J. Xiang, X. Shen, D. Yang, Y. Chen, V. Rac, V. Rakic and X. Du, Promoting effects of water on the NH<sub>3</sub>-SCR reaction over Cu-SAPO-34 catalysts: transient and permanent influences on Cu species, *Dalton Trans*, 2020, **49**, 764-773.
7. S. Zhou, F. Tang, H. Wang, S. Wang and L. Liu, Effect of Cu Concentration on the Selective Catalytic Reduction of NO with Ammonia for Aluminosilicate Zeolite SSZ-13 Catalysts, *The Journal of Physical Chemistry C*, 2021, **125**, 14675-14680.
8. B. Chen, R. Xu, R. Zhang and N. Liu, Economical way to synthesize SSZ-13 with abundant ion-exchanged Cu<sup>+</sup> for an extraordinary performance in selective catalytic reduction (SCR) of NO<sub>x</sub> by ammonia, *Environ Sci Technol*, 2014, **48**, 13909-13916.
9. X. Liu, X. Wu, D. Weng, Z. Si and R. Ran, Evolution of copper species on Cu/SAPO-34 SCR catalysts upon hydrothermal aging, *Catalysis Today*, 2017, **281**, 596-604.
10. N. Zhu, Z. Lian, Y. Zhang, W. Shan and H. He, The promotional effect of H<sub>2</sub> reduction treatment on the low-temperature NH<sub>3</sub>-SCR activity of Cu/SAPO-18, *Applied Surface Science*, 2019, **483**, 536-544.

11. H. Wang, X. Xu, J. Hao, P. Ning and Q. Zhang, Unravelling the phosphorus-induced effect on NH<sub>3</sub>-SCR catalytic performance, hydrothermal stability and SO<sub>2</sub> resistance of Cu/SAPO-34, *Applied Catalysis A: General*, 2022, **646**.
12. Y. Ma, S. Cheng, X. Wu, T. Ma, L. Liu, B. Jin, M. Liu, J. Liu, R. Ran, Z. Si and D. Weng, Improved hydrothermal durability of Cu-SSZ-13 NH<sub>3</sub>-SCR catalyst by surface Al modification: Affinity and passivation, *Journal of Catalysis*, 2022, **405**, 199-211.
13. A. G. Greenaway, A. Marberger, A. Thetford, I. Lezcano-Gonzalez, M. Agote-Aran, M. Nachtegaal, D. Ferri, O. Krocher, C. R. A. Catlow and A. M. Beale, Detection of key transient Cu intermediates in SSZ-13 during NH<sub>3</sub>-SCR deNO<sub>x</sub> by modulation excitation IR spectroscopy, *Chem Sci*, 2020, **11**, 447-455.
14. S. Zhang, J. Chen, Y. Meng, L. Pang, Y. Guo, Z. Luo, Y. Fang, Y. Dong, W. Cai and T. Li, Insight into solid-state ion-exchanged Cu-based zeolite (SSZ-13, SAPO-18, and SAPO-34) catalysts for the NH<sub>3</sub>-SCR reaction: The promoting role of NH<sub>4</sub>-form zeolite substrates, *Applied Surface Science*, 2022, **571**.
15. H. Zhu, J. H. Kwak, C. H. F. Peden and J. Szanyi, In situ DRIFTS-MS studies on the oxidation of adsorbed NH<sub>3</sub> by NO<sub>x</sub> over a Cu-SSZ-13 zeolite, *Catalysis Today*, 2013, **205**, 16-23.
16. Y. Li, J. Deng, W. Song, J. Liu, Z. Zhao, M. Gao, Y. Wei and L. Zhao, Nature of Cu Species in Cu-SAPO-18 Catalyst for NH<sub>3</sub>-SCR: Combination of Experiments and DFT Calculations, *The Journal of Physical Chemistry C*, 2016, **120**, 14669-14680.
17. L. Ma, Y. Cheng, G. Cavataio, R. W. McCabe, L. Fu and J. Li, In situ DRIFTS and temperature-programmed technology study on NH<sub>3</sub>-SCR of NO over Cu-SSZ-13 and Cu-SAPO-34 catalysts, *Applied Catalysis B: Environmental*, 2014, **156-157**, 428-437.
